# Supplementary material for: Repertoire of microRNAs in Epithelial Ovarian Cancer as Determined by Next Generation Sequencing of Small RNA cDNA Libraries
Source: PLoS One. 2009 Apr 23;4(4):e5311. doi: 10.1371/journal.pone.0005311 (PMC2668797; doi:10.1371/journal.pone.0005311)
Supplement: Table S1 — Overview of computational pipeline data processing results. Shaded lines represent steps at which sequences are pruned out of the dataset before the next step. The left column for each dataset contains the number of nonredundant unique sequences, and the right column is the sum of all the reads for each sequence. (0.02 MB XLS) [file pone.0005311.s001.xls]

## Sheet: ovresults
Supplementary Table S1: . Overview of computational pipeline data processing results. Shaded lines represent steps at which sequences are pruned out of the dataset before the next step. The left column for each dataset contains the number of nonredundant unique sequences, and the right column is the sum of all the reads for each sequence.
	HOSE Seqs	HOSE Reads	OSC Seqs	OSC Reads	OCC Seqs	OCC Reads	OEC Seqs	OEC Reads
Total original reads:		80501		273739		292942		91528
Remove markers:		-43		-33		-57		-20
	10544	80458	26849	273706	37792	292885	13134	91508
Remove exact matches to known mir:	-296	-55291 (68.72033 %)	-408	-200337 (73.19423 %)	-430	-199356 (68.06631 %)	-340	-65311 (71.37190 %)
	9623	25103	25083	72585	35925	92716	11862	25950
Remove matches to precursor seqs:	-157	-477 (0.59286 %)	-403	-2049 (0.74861 %)	-423	-2716 (0.92733 %)	-216	-584 (0.63820 %)
	9466	24626	24680	70536	35502	90000	11646	25366
Matches to other annotated features:	-1414	-7866 (9.77653 %)	-4656	-22772 (8.31988 %)	-4801	-26577 (9.07421 %)	-2147	-8010 (8.75333 %)
	8052	16760	20024	47764	30701	63423	9499	17356
Remove repetitive and non-hsa matching seqs:	-7211	-14799 (18.39345 %)	-17184	-42566 (15.55172 %)	-19477	-48431 (16.53584 %)	-7735	-14917 (16.30131 %)
	841 (1766 loci)	1961	2840 (5795 loci)	5198	11224 (19464 loci)	14992	1764 (3301 loci)	2439
Add trimmed sequences, and remove non-folding sequences:
	224 (368 loci)	421	511 (834 loci)	1070	500 (842 loci)	752	247 (388 loci)	414
Combine datasets and pick canonical sequences:	199 seqs 215 reads 568 loci
