# Supplementary material for: Repertoire of microRNAs in Epithelial Ovarian Cancer as Determined by Next Generation Sequencing of Small RNA cDNA Libraries
Source: PLoS One. 2009 Apr 23;4(4):e5311. doi: 10.1371/journal.pone.0005311 (PMC2668797; doi:10.1371/journal.pone.0005311)
Supplement: Table S2 — Identity, abundance data and pairwise relative expression data for all known miRNAs in 454 sequencing datasets. Columns B-I display the number of reads and fractional abundance values for miRNAs corresponding to the 4 sample types studied. Columns J-U provide pairwise comparisons of expression (along with Fisher's exact test P-values) of each miRNA between all combinations of the sample types studied. (0.21 MB XLS) [file pone.0005311.s002.xls]

## Sheet: big_known_ov_table.txt
Supplementary Table S2: Identity, abundance data and pairwise relative expression data for all known miRNAs in 454 sequencing datasets. Columns B-I display the number of reads and fractional abundance values for miRNAs corresponding to the 4 sample types studied. Columns J-U provide pairwise comparisons of expression (along with Fisher’s exact test P-values) of each miRNA between all combinations…
miRNA	HOSE reads	HOSE frac	OSC reads	OSC frac	OCC reads	OCC frac	OEC reads	OEC frac	HOSE vs OSC	fisher P-value	HOSE vs OCC	fisher P-value	HOSE vs OEC	fisher P-value	OSC vs OCC	fisher P-value	OSC vs OEC	fisher P-value	OCC vs OEC	fisher P-value	miRNA
hsa-miR-449a	0	0	1032	0.00377047	2	6.82862e-06	109	0.00119115	-	-	-	-	-	-	552.157	0	3.1654	0	0.00573278	0	hsa-miR-449a
hsa-miR-205	0	0	262	0.000957231	5	1.70715e-05	210	0.00229488	-	-	-	-	-	-	56.0717	0	0.417116	0	0.00743897	0	hsa-miR-205
hsa-miR-499-5p	0	0	10	3.65356e-05	5	1.70715e-05	74	0.000808672	-	-	-	-	-	-	2.14014	0.19832	0.0451797	0	0.0211106	0	hsa-miR-499-5p
hsa-miR-18b	0	0	17	6.21104e-05	2	6.82862e-06	23	0.000251344	-	-	-	-	-	-	9.09561	0.000283	0.247113	2.3e-05	0.0271684	0	hsa-miR-18b
hsa-miR-196b	53	0.000658729	67	0.000244788	25	8.53577e-05	249	0.00272107	0.371607	0	0.129579	0	4.1308	0	2.86779	3e-06	0.0899602	0	0.0313691	0	hsa-miR-196b
hsa-miR-106a	0	0	42	0.000153449	3	1.02429e-05	27	0.000295056	-	-	-	-	-	-	14.981	0	0.520068	0.011553	0.0347152	0	hsa-miR-106a
hsa-miR-196a	6	7.45731e-05	20	7.30711e-05	10	3.41431e-05	79	0.000863312	0.979859	1	0.457848	0.13035	11.5767	0	2.14014	0.046247	0.0846404	0	0.0395489	0	hsa-miR-196a
hsa-miR-135a	0	0	230	0.000840318	14	4.78003e-05	104	0.00113651	-	-	-	-	-	-	17.5797	0	0.739383	0.011496	0.0420588	0	hsa-miR-135a
hsa-miR-375	0	0	4	1.46142e-05	3	1.02429e-05	18	0.000196704	-	-	-	-	-	-	1.42676	0.718276	0.0742955	0	0.0520728	0	hsa-miR-375
hsa-miR-182	1	1.24288e-05	121	0.00044208	45	0.000153644	222	0.00242602	35.5689	0	12.3619	0.000425	195.193	0	2.8773	0	0.182225	0	0.0633317	0	hsa-miR-182
hsa-miR-20b	0	0	108	0.000394584	28	9.56007e-05	76	0.000830528	-	-	-	-	-	-	4.12742	0	0.4751	1e-06	0.115108	0	hsa-miR-20b
hsa-miR-96	0	0	21	7.67247e-05	16	5.46289e-05	39	0.000426192	-	-	-	-	-	-	1.40447	0.327115	0.180024	0	0.128179	0	hsa-miR-96
hsa-miR-183	0	0	30	0.000109607	21	7.17005e-05	51	0.000557328	-	-	-	-	-	-	1.52867	0.160798	0.196664	0	0.12865	0	hsa-miR-183
hsa-miR-9	0	0	32	0.000116914	31	0.000105844	42	0.000458976	-	-	-	-	-	-	1.10459	0.707142	0.254727	0	0.230608	0	hsa-miR-9
hsa-miR-135b	6	7.45731e-05	860	0.00314206	497	0.00169691	492	0.00537658	42.1339	0	22.755	0	72.0981	0	1.85163	0	0.584397	0	0.315612	0	hsa-miR-135b
hsa-miR-200b	23	0.000285863	3290	0.0120202	2852	0.00973761	2428	0.0265332	42.0487	0	34.0639	0	92.8177	0	1.23441	0	0.453025	0	0.366997	0	hsa-miR-200b
hsa-miR-93	116	0.00144175	939	0.00343069	459	0.00156717	332	0.0036281	2.37954	0	1.08699	0.446617	2.51646	0	2.1891	0	0.945589	0.381408	0.431953	0	hsa-miR-93
hsa-miR-200a	12	0.000149146	853	0.00311648	907	0.00309678	655	0.00715784	20.8955	0	20.7634	0	47.9922	0	1.00636	0.904938	0.435394	0	0.432641	0	hsa-miR-200a
hsa-miR-19b	182	0.00226205	2684	0.00980614	1072	0.00366014	661	0.00722341	4.33507	0	1.61806	0	3.1933	0	2.67917	0	1.35755	0	0.506705	0	hsa-miR-19b
hsa-miR-200c	23	0.000285863	15314	0.0559505	9001	0.0307322	5077	0.0554815	195.725	0	107.507	0	194.084	0	1.82058	0	1.00845	0.600352	0.553918	0	hsa-miR-200c
hsa-miR-10a	76	0.000944592	354	0.00129336	298	0.00101746	165	0.00180312	1.36922	0.013135	1.07715	0.614737	1.90889	2e-06	1.27116	0.00251	0.717289	0.000554	0.564279	0	hsa-miR-10a
hsa-miR-16	172	0.00213776	6868	0.0250926	2622	0.00895232	1211	0.0132338	11.7378	0	4.18771	0	6.1905	0	2.80292	0	1.8961	0	0.676473	0	hsa-miR-16
hsa-miR-141	0	0	1411	0.00515517	908	0.00310019	411	0.00449141	-	-	-	-	-	-	1.66285	0	1.14778	0.013636	0.690249	0	hsa-miR-141
hsa-miR-106b	105	0.00130503	1665	0.00608317	1129	0.00385476	494	0.00539844	4.66133	0	2.95377	0	4.13664	0	1.57809	0	1.12684	0.019208	0.71405	0	hsa-miR-106b
hsa-let-7b	12614	0.156777	12517	0.0457316	16346	0.0558103	7031	0.0768348	0.291697	0	0.355984	0	0.490088	0	0.819411	0	0.595193	0	0.726367	0	hsa-let-7b
hsa-let-7f	1207	0.0150016	12876	0.0470432	10611	0.0362292	3840	0.0419635	3.13587	0	2.41502	0	2.79727	0	1.29849	0	1.12105	0	0.86335	0	hsa-let-7f
hsa-miR-21	10444	0.129807	38612	0.141071	34979	0.119429	12337	0.134819	1.08678	0	0.920053	0	1.03861	0.002228	1.18121	0	1.04638	2e-06	0.885849	0	hsa-miR-21
hsa-let-7a	3079	0.0382684	13067	0.047741	15639	0.0533964	5369	0.0586725	1.24753	0	1.39531	0	1.53318	0	0.894087	0	0.813687	0	0.910076	0	hsa-let-7a
hsa-miR-142-3p	5	6.21442e-05	4760	0.0173909	3722	0.0127081	902	0.00985706	279.848	0	204.493	0	158.616	0	1.3685	0	1.76431	0	1.28923	0	hsa-miR-142-3p
hsa-let-7i	2125	0.0264113	2913	0.0106428	3033	0.0103556	692	0.00756218	0.402964	0	0.39209	0	0.286324	0	1.02773	0.290712	1.40737	0	1.36939	0	hsa-let-7i
hsa-let-7e	335	0.00416366	718	0.00262325	1264	0.00431569	271	0.00296149	0.630035	0	1.03651	0.583299	0.71127	3.1e-05	0.607841	0	0.885788	0.090993	1.45727	0	hsa-let-7e
hsa-miR-195	6	7.45731e-05	985	0.00359875	1373	0.00468785	286	0.00312541	48.2581	0	62.8625	0	41.9107	0	0.767677	0	1.15145	0.035083	1.49991	0	hsa-miR-195
hsa-miR-125a-5p	389	0.00483482	467	0.00170621	804	0.0027451	160	0.00174848	0.3529	0	0.567778	0	0.361643	0	0.621547	0	0.975824	0.782102	1.56999	0	hsa-miR-125a-5p
hsa-miR-24	782	0.00971936	1622	0.00592607	1519	0.00518634	295	0.00322376	0.609718	0	0.533609	0	0.331685	0	1.14263	0.000182	1.83825	0	1.60878	0	hsa-miR-24
hsa-miR-125b	7055	0.0876855	5822	0.021271	11457	0.0391177	2225	0.0243148	0.242583	0	0.446114	0	0.277296	0	0.543769	0	0.874816	0	1.6088	0	hsa-miR-125b
hsa-let-7c	407	0.00505854	10627	0.0388263	9453	0.0322755	1765	0.0192879	7.6754	0	6.38039	0	3.81294	0	1.20297	0	2.01299	0	1.67335	0	hsa-let-7c
hsa-miR-199b-3p	64	0.000795446	1901	0.00694541	3023	0.0103215	480	0.00524544	8.73146	0	12.9757	0	6.59434	0	0.67291	0	1.32408	0	1.9677	0	hsa-miR-199b-3p
hsa-miR-143	71	0.000882448	2956	0.0107999	4006	0.0136777	616	0.00673165	12.2386	0	15.4998	0	7.62838	0	0.789598	0	1.60435	0	2.03185	0	hsa-miR-143
hsa-miR-27b	546	0.00678615	1423	0.00519901	1596	0.00544924	231	0.00252437	0.766121	0	0.802994	1.3e-05	0.371988	0	0.95408	0.201198	2.05953	0	2.15865	0	hsa-miR-27b
hsa-miR-30c	57	0.000708444	2033	0.00742768	4084	0.013944	520	0.00568256	10.4845	0	19.6826	0	8.02119	0	0.532678	0	1.3071	0	2.45383	0	hsa-miR-30c
hsa-miR-145	38	0.000472296	566	0.00206791	1255	0.00428496	156	0.00170477	4.37842	0	9.07261	0	3.60953	0	0.482598	0	1.21302	0.031636	2.51351	0	hsa-miR-145
hsa-miR-23b	137	0.00170275	752	0.00274747	992	0.00338699	115	0.00125672	1.61355	0	1.98913	0	0.738053	0.016364	0.811183	1.4e-05	2.18622	0	2.69511	0	hsa-miR-23b
hsa-miR-214	11	0.000136717	159	0.000580915	474	0.00161838	49	0.000535472	4.24903	0	11.8374	0	3.91664	6e-06	0.358948	0	1.08487	0.689051	3.02235	0	hsa-miR-214
hsa-miR-185	134	0.00166547	52	0.000189985	168	0.000573604	16	0.000174848	0.114073	0	0.344411	0	0.104985	0	0.331213	0	1.08657	0.888861	3.28058	0	hsa-miR-185
hsa-miR-505	56	0.000696015	135	0.00049323	424	0.00144767	36	0.000393408	0.708648	0.037663	2.07994	0	0.565229	0.008632	0.340707	0	1.25374	0.251439	3.67981	0	hsa-miR-505
hsa-miR-574-3p	44	0.000546869	62	0.00022652	144	0.000491661	12	0.000131136	0.414213	2.1e-05	0.899046	0.534817	0.239794	1e-06	0.460725	0	1.72737	0.082086	3.74924	0	hsa-miR-574-3p
hsa-miR-199a-5p	166	0.00206319	1293	0.00472405	4622	0.0157809	364	0.00397779	2.28968	0	7.64881	0	1.92798	0	0.299351	0	1.1876	0.00342	3.96726	0	hsa-miR-199a-5p
hsa-miR-30a	63	0.000783017	797	0.00291188	3527	0.0120423	238	0.00260087	3.7188	0	15.3793	0	3.32159	0	0.241805	0	1.11958	0.131387	4.6301	0	hsa-miR-30a
hsa-miR-144	0	0	52	0.000189985	306	0.00104478	20	0.00021856	-	-	-	-	-	-	0.181842	0	0.869257	0.587519	4.78028	0	hsa-miR-144
hsa-miR-451	0	0	318	0.00116183	688	0.00234904	38	0.000415264	-	-	-	-	-	-	0.494597	0	2.79781	0	5.65675	0	hsa-miR-451
hsa-miR-486-5p	0	0	19	6.94176e-05	143	0.000488246	5	5.464e-05	-	-	-	-	-	-	0.142177	0	1.27045	0.81474	8.93569	0	hsa-miR-486-5p
hsa-miR-184	0	0	13	4.74962e-05	0	0	10	0.00010928	-	-	-	-	-	-	-	-	0.434628	0.052783	0	1e-06	hsa-miR-184
hsa-miR-146a	137	0.00170275	82	0.000299592	61	0.000208273	50	0.0005464	0.175946	0	0.122315	0	0.320893	0	1.43846	0.036082	0.5483	0.0012	0.381173	1e-06	hsa-miR-146a
hsa-miR-203	0	0	136	0.000496884	146	0.000498489	90	0.000983521	-	-	-	-	-	-	0.996779	1	0.505209	1e-06	0.506842	1e-06	hsa-miR-203
hsa-miR-222	483	0.00600313	590	0.0021556	498	0.00170033	92	0.00100538	0.359079	0	0.28324	0	0.167475	0	1.26776	0.0001	2.14407	0	1.69123	1e-06	hsa-miR-222
hsa-miR-7	7	8.70019e-05	97	0.000354395	11	3.75574e-05	20	0.00021856	4.07341	1.9e-05	0.431685	0.08538	2.51213	0.033559	9.43609	0	1.6215	0.05405	0.17184	2e-06	hsa-miR-7
hsa-miR-497	3	3.72865e-05	101	0.000369009	122	0.000416546	10	0.00010928	9.89658	0	11.1715	0	2.93082	0.100928	0.885879	0.384031	3.37673	2.5e-05	3.81173	2e-06	hsa-miR-497
hsa-miR-99a	5	6.21442e-05	343	0.00125317	254	0.000867235	37	0.000404336	20.1655	0	13.9552	0	6.50642	3e-06	1.44502	8e-06	3.09933	0	2.14484	3e-06	hsa-miR-99a
hsa-miR-30a*	4	4.97154e-05	10	3.65356e-05	87	0.000297045	5	5.464e-05	0.734894	0.536169	5.97491	9e-06	1.09906	1	0.122997	0	0.668659	0.549935	5.4364	4e-06	hsa-miR-30a*
hsa-miR-29a	145	0.00180218	2296	0.00838856	1366	0.00466395	540	0.00590112	4.65467	0	2.58794	0	3.27443	0	1.7986	0	1.42152	0	0.790349	5e-06	hsa-miR-29a
hsa-miR-15b	138	0.00171518	1209	0.00441715	1330	0.00454103	526	0.00574813	2.57533	0	2.64755	0	3.35133	0	0.972719	0.486165	0.768449	1e-06	0.790001	6e-06	hsa-miR-15b
hsa-miR-181a	90	0.0011186	66	0.000241135	73	0.000249245	53	0.000579184	0.215569	0	0.222819	0	0.517778	0.000143	0.967462	0.865541	0.416335	4e-06	0.430337	8e-06	hsa-miR-181a
hsa-miR-101	24	0.000298292	305	0.00111433	287	0.000979907	46	0.000502688	3.73571	0	3.28506	0	1.68522	0.041251	1.13718	0.118143	2.21675	0	1.94933	8e-06	hsa-miR-101
hsa-miR-429	0	0	112	0.000409198	136	0.000464346	81	0.000885169	-	-	-	-	-	-	0.881235	0.340646	0.462283	0	0.524585	1e-05	hsa-miR-429
hsa-miR-20a	40	0.000497154	2009	0.00733999	996	0.00340065	400	0.0043712	14.764	0	6.84024	0	8.79246	0	2.15841	0	1.67917	0	0.777967	3.2e-05	hsa-miR-20a
hsa-miR-148a	2	2.48577e-05	30	0.000109607	14	4.78003e-05	19	0.000207632	4.40937	0.031783	1.92296	0.547786	8.35283	0.000587	2.29301	0.00978	0.527889	0.031953	0.230216	3.3e-05	hsa-miR-148a
hsa-miR-214*	8	9.94308e-05	64	0.000233828	72	0.00024583	4	4.3712e-05	2.35166	0.016423	2.47238	0.009456	0.439623	0.247073	0.951175	0.797259	5.34927	6.2e-05	5.62386	3.4e-05	hsa-miR-214*
hsa-miR-191	280	0.00348008	1028	0.00375585	1076	0.0036738	425	0.0046444	1.07924	0.275276	1.05567	0.4274	1.33457	0.000177	1.02234	0.615271	0.808684	0.000271	0.791016	5.3e-05	hsa-miR-191
hsa-miR-140-3p	55	0.000683586	79	0.000288631	174	0.00059409	24	0.000262272	0.42223	2e-06	0.869078	0.376369	0.383671	6e-05	0.485837	0	1.1005	0.734158	2.26517	5.3e-05	hsa-miR-140-3p
hsa-miR-34a	513	0.006376	517	0.00188889	904	0.00308654	363	0.00396687	0.29625	0	0.484087	0	0.622156	0	0.611977	0	0.476166	0	0.778079	7.2e-05	hsa-miR-34a
hsa-miR-29c	21	0.000261006	718	0.00262325	562	0.00191884	119	0.00130043	10.0506	0	7.35172	0	4.98239	0	1.3671	0	2.01722	0	1.47554	7.2e-05	hsa-miR-29c
hsa-miR-31*	744	0.00924706	170	0.000621104	218	0.000744319	109	0.00119115	0.0671678	0	0.0804925	0	0.128814	0	0.834459	0.083922	0.521431	0	0.624873	9.2e-05	hsa-miR-31*
hsa-let-7d	201	0.0024982	954	0.00348549	934	0.00318896	220	0.00240416	1.3952	1.1e-05	1.27651	0.001452	0.962358	0.695981	1.09299	0.055531	1.44977	0	1.32644	0.00012	hsa-let-7d
hsa-miR-152	194	0.0024112	87	0.000317859	157	0.000536047	22	0.000240416	0.131826	0	0.222316	0	0.0997083	0	0.59297	8.6e-05	1.32212	0.269689	2.22966	0.000145	hsa-miR-152
hsa-miR-365	39	0.000484725	132	0.000482269	261	0.000891135	46	0.000502688	0.994934	1	1.83843	0.000184	1.03706	0.91365	0.541186	0	0.95938	0.795577	1.77274	0.000166	hsa-miR-365
hsa-miR-107	3	3.72865e-05	121	0.00044208	79	0.00026973	50	0.0005464	11.8563	0	7.23399	1e-05	14.6541	0	1.63897	0.000647	0.809077	0.216472	0.49365	0.000167	hsa-miR-107
hsa-miR-183*	0	0	11	4.01891e-05	5	1.70715e-05	11	0.000120208	-	-	-	-	-	-	2.35416	0.133381	0.33433	0.011903	0.142017	0.000178	hsa-miR-183*
hsa-miR-181c*	1	1.24288e-05	5	1.82678e-05	0	0	6	6.5568e-05	1.46979	1	0	0.215507	5.27547	0.130412	-	-	0.278608	0.034686	0	0.000182	hsa-miR-181c*
hsa-miR-190b	0	0	12	4.38427e-05	0	0	6	6.5568e-05	-	-	-	-	-	-	-	-	0.668659	0.418635	0	0.000182	hsa-miR-190b
hsa-miR-363	0	0	5	1.82678e-05	1	3.41431e-06	7	7.6496e-05	-	-	-	-	-	-	5.35036	0.113379	0.238807	0.014432	0.0446338	0.000274	hsa-miR-363
hsa-miR-150	0	0	62	0.00022652	55	0.000187787	3	3.2784e-05	-	-	-	-	-	-	1.20626	0.354952	6.90948	2.1e-05	5.728	0.000286	hsa-miR-150
hsa-miR-25	30	0.000372865	194	0.00070879	161	0.000549704	82	0.000896097	1.90093	0.000568	1.47427	0.052488	2.40327	1.7e-05	1.2894	0.019293	0.790975	0.08209	0.613443	0.000495	hsa-miR-25
hsa-miR-103	235	0.00292078	372	0.00135912	437	0.00149205	93	0.0010163	0.465329	0	0.510841	0	0.347957	0	0.910908	0.192748	1.33732	0.011753	1.46812	0.00061	hsa-miR-103
hsa-miR-345	5	6.21442e-05	24	8.76853e-05	73	0.000249245	7	7.6496e-05	1.411	0.657778	4.01074	0.000468	1.23094	0.779938	0.351804	3e-06	1.14627	0.838836	3.25827	0.000878	hsa-miR-345
hsa-miR-425	7	8.70019e-05	20	7.30711e-05	17	5.80433e-05	17	0.000185776	0.839879	0.649859	0.667149	0.330399	2.13531	0.101914	1.25891	0.514017	0.393329	0.006679	0.312437	0.000907	hsa-miR-425
hsa-miR-1308	73	0.000907306	50	0.000182678	17	5.80433e-05	17	0.000185776	0.201341	0	0.0639732	0	0.204756	0	3.14727	1.4e-05	0.983322	1	0.312437	0.000907	hsa-miR-1308
hsa-miR-29b	286	0.00355465	1857	0.00678465	936	0.00319579	360	0.00393408	1.90867	0	0.899046	0.116868	1.10674	0.206295	2.12299	0	1.72458	0	0.812335	0.00096	hsa-miR-29b
hsa-miR-577	0	0	2	7.30711e-06	1	3.41431e-06	6	6.5568e-05	-	-	-	-	-	-	2.14014	0.61275	0.111443	0.004278	0.0520728	0.001014	hsa-miR-577
hsa-miR-18a	19	0.000236148	452	0.00165141	320	0.00109258	140	0.00152992	6.9931	0	4.62667	0	6.47865	0	1.51148	0	1.07941	0.447842	0.714141	0.001199	hsa-miR-18a
hsa-miR-17	369	0.00458624	2788	0.0101861	1759	0.00600577	637	0.00696114	2.22101	0	1.30952	1e-06	1.51783	0	1.69605	0	1.46328	0	0.862757	0.001491	hsa-miR-17
hsa-miR-130a	421	0.00523254	1132	0.00413582	779	0.00265975	302	0.00330026	0.790404	5.3e-05	0.508309	0	0.630718	0	1.55497	0	1.25318	0.000395	0.805921	0.001643	hsa-miR-130a
hsa-miR-10b	20	0.000248577	541	0.00197657	1048	0.0035782	394	0.00430563	7.95156	0	14.3947	0	17.3211	0	0.552394	0	0.459067	0	0.83105	0.001942	hsa-miR-10b
hsa-miR-204	18	0.000223719	77	0.000281324	88	0.000300459	48	0.000524544	1.25749	0.462279	1.34302	0.28832	2.34465	0.001814	0.936313	0.69734	0.53632	0.000912	0.5728	0.002428	hsa-miR-204
hsa-let-7b*	3	3.72865e-05	4	1.46142e-05	3	1.02429e-05	7	7.6496e-05	0.391944	0.197772	0.274709	0.118844	2.05157	0.353841	1.42676	0.718276	0.191045	0.007661	0.133901	0.002588	hsa-let-7b*
hsa-miR-342-5p	1	1.24288e-05	10	3.65356e-05	3	1.02429e-05	7	7.6496e-05	2.93958	0.4747	0.824126	1	6.15472	0.074831	3.56691	0.050761	0.477614	0.15773	0.133901	0.002588	hsa-miR-342-5p
hsa-miR-127-3p	65	0.000807875	10	3.65356e-05	37	0.000126329	2	2.1856e-05	0.0452243	0	0.156373	0	0.0270537	0	0.289209	0.000193	1.67165	0.741895	5.78008	0.003983	hsa-miR-127-3p
hsa-miR-19a	29	0.000360437	574	0.00209714	281	0.000959421	121	0.00132229	5.81834	0	2.66183	0	3.66858	0	2.18584	0	1.58599	2e-06	0.725576	0.004019	hsa-miR-19a
hsa-miR-199b-5p	3	3.72865e-05	154	0.000562648	250	0.000853577	51	0.000557328	15.0898	0	22.8924	0	14.9472	0	0.659164	4.2e-05	1.00954	1	1.53155	0.004406	hsa-miR-199b-5p
hsa-miR-140-5p	49	0.000609013	49	0.000179024	68	0.000232173	8	8.74241e-05	0.293958	0	0.381228	1e-06	0.14355	0	0.771081	0.166667	2.04777	0.065284	2.65571	0.004503	hsa-miR-140-5p
hsa-miR-146b-5p	32	0.000397723	670	0.00244788	338	0.00115404	74	0.000808672	6.15474	0	2.90161	0	2.03326	0.000602	2.12115	0	3.02704	0	1.42708	0.004549	hsa-miR-146b-5p
hsa-miR-202*	0	0	138	0.000504191	452	0.00154327	105	0.00114744	-	-	-	-	-	-	0.326703	0	0.439405	0	1.34497	0.005292	hsa-miR-202*
hsa-miR-382	96	0.00119317	12	4.38427e-05	45	0.000153644	4	4.3712e-05	0.0367447	0	0.12877	0	0.0366352	0	0.285352	2.8e-05	1.00299	1	3.51491	0.006971	hsa-miR-382
hsa-miR-9*	0	0	10	3.65356e-05	3	1.02429e-05	6	6.5568e-05	-	-	-	-	-	-	3.56691	0.050761	0.557216	0.254009	0.156218	0.007741	hsa-miR-9*
hsa-miR-15a	20	0.000248577	594	0.00217021	556	0.00189836	135	0.00147528	8.73055	0	7.6369	0	5.93491	0	1.14321	0.024747	1.47105	3.2e-05	1.28678	0.008289	hsa-miR-15a
hsa-miR-27a	243	0.00302021	1261	0.00460713	763	0.00260512	193	0.00210911	1.52544	0	0.862562	0.045885	0.698331	0.000208	1.76849	0	2.1844	0	1.23518	0.008659	hsa-miR-27a
hsa-miR-193b	16	0.000198862	26	9.49924e-05	33	0.000112672	2	2.1856e-05	0.477681	0.025432	0.566586	0.079763	0.109906	0.00045	0.843087	0.602696	4.34628	0.027808	5.1552	0.00885	hsa-miR-193b
hsa-miR-1274b	3	3.72865e-05	21	7.67247e-05	5	1.70715e-05	7	7.6496e-05	2.0577	0.330145	0.457848	0.381611	2.05157	0.353841	4.4943	0.001192	1.00299	1	0.223169	0.010795	hsa-miR-1274b
hsa-miR-660	12	0.000149146	58	0.000211906	183	0.000624819	36	0.000393408	1.4208	0.318492	4.1893	0	2.63774	0.002256	0.339148	0	0.538642	0.004191	1.58822	0.010845	hsa-miR-660
hsa-miR-130b*	10	0.000124288	8	2.92284e-05	7	2.39002e-05	8	8.74241e-05	0.235166	0.00256	0.192296	0.000923	0.703396	0.487083	1.22294	0.798592	0.33433	0.037384	0.273382	0.012821	hsa-miR-130b*
hsa-miR-31	1703	0.0211663	191	0.000697829	337	0.00115062	136	0.00148621	0.0329688	0	0.054361	0	0.0702157	0	0.60648	0	0.469536	0	0.7742	0.012913	hsa-miR-31
hsa-miR-449b	0	0	20	7.30711e-05	1	3.41431e-06	4	4.3712e-05	-	-	-	-	-	-	21.4014	6e-06	1.67165	0.480489	0.0781092	0.013	hsa-miR-449b
hsa-miR-20a*	0	0	6	2.19213e-05	0	0	3	3.2784e-05	-	-	-	-	-	-	-	-	0.668659	0.699884	0	0.013491	hsa-miR-20a*
hsa-miR-455-3p	102	0.00126774	83	0.000303245	285	0.000973078	64	0.000699392	0.239201	0	0.767568	0.025751	0.551683	0.000172	0.311635	0	0.433584	1e-06	1.39132	0.016716	hsa-miR-455-3p
hsa-miR-138	1	1.24288e-05	0	0	24	8.19434e-05	1	1.0928e-05	0	0.227177	6.593	0.028171	0.879246	1	0	0	0	0.25056	7.49848	0.016974	hsa-miR-138
hsa-miR-885-5p	0	0	14	5.11498e-05	56	0.000191201	7	7.6496e-05	-	-	-	-	-	-	0.267518	2e-06	0.668659	0.448456	2.49949	0.017127	hsa-miR-885-5p
hsa-miR-324-5p	80	0.000994308	173	0.000632065	128	0.000437032	58	0.000633824	0.635684	0.001189	0.439534	0	0.637453	0.010216	1.44627	0.00149	0.997224	1	0.689515	0.020121	hsa-miR-324-5p
hsa-miR-27b*	57	0.000708444	81	0.000295938	73	0.000249245	11	0.000120208	0.417729	1e-06	0.35182	0	0.169679	0	1.18734	0.295388	2.46188	0.002497	2.07344	0.02055	hsa-miR-27b*
hsa-miR-340	0	0	4	1.46142e-05	9	3.07288e-05	9	9.83521e-05	-	-	-	-	-	-	0.475587	0.270434	0.148591	0.001006	0.312437	0.021529	hsa-miR-340
hsa-miR-190	5	6.21442e-05	32	0.000116914	60	0.000204859	8	8.74241e-05	1.88133	0.23874	3.2965	0.003958	1.40679	0.591313	0.570705	0.01187	1.33732	0.584705	2.34327	0.021592	hsa-miR-190
hsa-miR-181c	0	0	15	5.48033e-05	3	1.02429e-05	5	5.464e-05	-	-	-	-	-	-	5.35036	0.003505	1.00299	1	0.187462	0.022172	hsa-miR-181c
hsa-miR-151-3p	115	0.00142932	152	0.00055534	175	0.000597504	36	0.000393408	0.388535	0	0.418035	0	0.275242	0	0.929434	0.54271	1.41161	0.064003	1.51879	0.023225	hsa-miR-151-3p
hsa-miR-224	18	0.000223719	156	0.000569955	102	0.00034826	18	0.000196704	2.54763	3.9e-05	1.55668	0.094982	0.879246	0.740207	1.63658	0.000105	2.89752	2e-06	1.77047	0.023905	hsa-miR-224
hsa-miR-200b*	0	0	2	7.30711e-06	5	1.70715e-05	6	6.5568e-05	-	-	-	-	-	-	0.428029	0.455	0.111443	0.004278	0.260364	0.027249	hsa-miR-200b*
hsa-miR-29a*	28	0.000348008	23	8.40318e-05	14	4.78003e-05	11	0.000120208	0.241465	1e-06	0.137354	0	0.345418	0.001997	1.75797	0.101229	0.699053	0.325191	0.397647	0.03076	hsa-miR-29a*
hsa-miR-615-3p	10	0.000124288	3	1.09607e-05	2	6.82862e-06	4	4.3712e-05	0.0881873	5.2e-05	0.0549417	9e-06	0.351698	0.104794	1.60511	0.677661	0.250747	0.071073	0.156218	0.031645	hsa-miR-615-3p
hsa-miR-30b	57	0.000708444	2399	0.00876488	2628	0.00897281	752	0.00821786	12.372	0	12.6655	0	11.5999	0	0.976827	0.410988	1.06656	0.126559	1.09187	0.033179	hsa-miR-30b
hsa-miR-193a-3p	254	0.00315693	284	0.00103761	212	0.000723834	47	0.000513616	0.328677	0	0.229284	0	0.162695	0	1.43349	7.4e-05	2.0202	2e-06	1.40929	0.034056	hsa-miR-193a-3p
hsa-miR-181b	20	0.000248577	18	6.5764e-05	24	8.19434e-05	15	0.00016392	0.264562	5.8e-05	0.32965	0.000371	0.659434	0.238702	0.802554	0.538347	0.401195	0.013842	0.499899	0.038351	hsa-miR-181b
hsa-miR-30d	100	0.00124288	1768	0.00645949	1626	0.00555167	562	0.00614154	5.19717	0	4.46676	0	4.94136	0	1.16352	1e-05	1.05177	0.302508	0.903954	0.039037	hsa-miR-30d
hsa-miR-654-3p	8	9.94308e-05	7	2.55749e-05	20	6.82862e-05	1	1.0928e-05	0.257213	0.009582	0.686771	0.360347	0.109906	0.01549	0.374525	0.020986	2.34031	0.688536	6.24873	0.039714	hsa-miR-654-3p
hsa-miR-200a*	1	1.24288e-05	1	3.65356e-06	4	1.36572e-05	5	5.464e-05	0.293958	0.402745	1.09883	1	4.39623	0.22454	0.267518	0.376429	0.0668659	0.004688	0.249949	0.040209	hsa-miR-200a*
hsa-miR-10a*	3	3.72865e-05	9	3.2882e-05	9	3.07288e-05	8	8.74241e-05	0.881873	0.741133	0.824126	0.729379	2.34465	0.237149	1.07007	1	0.376121	0.048156	0.351491	0.040406	hsa-miR-10a*
hsa-miR-99b	259	0.00321907	241	0.000880507	309	0.00105502	74	0.000808672	0.273528	0	0.327741	0	0.251213	0	0.834587	0.036442	1.08883	0.558521	1.30463	0.041106	hsa-miR-99b
hsa-miR-1307	6	7.45731e-05	3	1.09607e-05	26	8.8772e-05	2	2.1856e-05	0.146979	0.006052	1.1904	0.831705	0.293082	0.157995	0.12347	2e-05	0.501494	0.604787	4.06168	0.043367	hsa-miR-1307
hsa-miR-125a-3p	4	4.97154e-05	0	0	1	3.41431e-06	3	3.2784e-05	0	0.002663	0.0686771	0.008925	0.659434	0.712577	0	1	0	0.01573	0.104146	0.044329	hsa-miR-125a-3p
hsa-miR-154*	2	2.48577e-05	1	3.65356e-06	1	3.41431e-06	3	3.2784e-05	0.146979	0.131379	0.137354	0.119311	1.31887	1	1.07007	1	0.111443	0.051096	0.104146	0.044329	hsa-miR-154*
hsa-miR-433	1	1.24288e-05	1	3.65356e-06	1	3.41431e-06	3	3.2784e-05	0.293958	0.402745	0.274709	0.384571	2.63774	0.628086	1.07007	1	0.111443	0.051096	0.104146	0.044329	hsa-miR-433
hsa-miR-1301	1	1.24288e-05	3	1.09607e-05	1	3.41431e-06	3	3.2784e-05	0.881873	1	0.274709	0.384571	2.63774	0.628086	3.21021	0.358952	0.33433	0.170319	0.104146	0.044329	hsa-miR-1301
hsa-miR-21*	98	0.00121803	60	0.000219213	76	0.000259488	13	0.000142064	0.179974	0	0.213039	0	0.116635	0	0.844793	0.345954	1.54306	0.177072	1.82655	0.045654	hsa-miR-21*
hsa-miR-128	14	0.000174004	24	8.76853e-05	39	0.000133158	21	0.000229488	0.503928	0.050642	0.765259	0.403282	1.31887	0.499172	0.658506	0.129733	0.382091	0.001654	0.580239	0.048439	hsa-miR-128
hsa-miR-148b*	0	0	0	0	0	0	2	2.1856e-05	-	-	-	-	-	-	-	-	0	0.06278	0	0.056671	hsa-miR-148b*
hsa-miR-32	2	2.48577e-05	68	0.000248442	105	0.000358502	21	0.000229488	9.99456	5e-06	14.4222	0	9.23208	0.000185	0.692999	0.018318	1.08259	0.807785	1.56218	0.060048	hsa-miR-32
hsa-miR-23a	540	0.00671158	1179	0.00430754	951	0.00324701	261	0.00285221	0.641808	0	0.483792	0	0.424969	0	1.32662	0	1.51025	0	1.13842	0.063245	hsa-miR-23a
hsa-miR-342-3p	11	0.000136717	90	0.00032882	110	0.000375574	22	0.000240416	2.40511	0.004011	2.74709	0.000368	1.75849	0.161947	0.875513	0.358399	1.36771	0.229667	1.56218	0.065015	hsa-miR-342-3p
hsa-miR-598	3	3.72865e-05	8	2.92284e-05	16	5.46289e-05	11	0.000120208	0.783887	0.720864	1.46511	0.780681	3.2239	0.064455	0.535036	0.157197	0.243149	0.002333	0.454453	0.066495	hsa-miR-598
hsa-miR-374a	1	1.24288e-05	13	4.74962e-05	38	0.000129744	5	5.464e-05	3.82145	0.214414	10.4389	0.001448	4.39623	0.22454	0.366077	0.001106	0.869257	0.787336	2.37452	0.071913	hsa-miR-374a
hsa-miR-708	7	8.70019e-05	60	0.000219213	55	0.000187787	9	9.83521e-05	2.51964	0.013118	2.15842	0.061942	1.13046	1	1.16735	0.45552	2.22886	0.018276	1.90933	0.077323	hsa-miR-708
hsa-miR-454	0	0	44	0.000160756	24	8.19434e-05	14	0.000152992	-	-	-	-	-	-	1.9618	0.007383	1.05075	1	0.535606	0.083539	hsa-miR-454
hsa-miR-338-3p	4	4.97154e-05	61	0.000222867	27	9.21864e-05	3	3.2784e-05	4.48286	0.00055	1.85428	0.282991	0.659434	0.712577	2.41757	9.9e-05	6.79803	3.3e-05	2.81193	0.086571	hsa-miR-338-3p
hsa-miR-26b	12	0.000149146	842	0.00307629	790	0.0026973	278	0.00303799	20.626	0	18.085	0	20.3692	0	1.14051	0.007948	1.01261	0.890145	0.887859	0.090824	hsa-miR-26b
hsa-miR-1287	6	7.45731e-05	0	0	2	6.82862e-06	3	3.2784e-05	0	0.000137	0.0915695	0.001866	0.439623	0.320553	0	0.500572	0	0.01573	0.208291	0.091323	hsa-miR-1287
hsa-miR-1296	1	1.24288e-05	1	3.65356e-06	2	6.82862e-06	3	3.2784e-05	0.293958	0.402745	0.549417	0.517201	2.63774	0.628086	0.535036	1	0.111443	0.051096	0.208291	0.091323	hsa-miR-1296
hsa-miR-532-5p	5	6.21442e-05	30	0.000109607	61	0.000208273	11	0.000120208	1.76375	0.313087	3.35144	0.003977	1.93434	0.316521	0.526265	0.004358	0.911808	0.856904	1.7326	0.097163	hsa-miR-532-5p
hsa-miR-29b-1*	2	2.48577e-05	13	4.74962e-05	4	1.36572e-05	4	4.3712e-05	1.91073	0.544316	0.549417	0.615797	1.75849	0.69135	3.47773	0.026818	1.08657	1	0.312437	0.097944	hsa-miR-29b-1*
hsa-miR-886-3p	10	0.000124288	14	5.11498e-05	4	1.36572e-05	4	4.3712e-05	0.411541	0.046466	0.109883	9.1e-05	0.351698	0.104794	3.74525	0.016363	1.17015	1	0.312437	0.097944	hsa-miR-886-3p
hsa-miR-218	7	8.70019e-05	54	0.000197292	21	7.17005e-05	12	0.000131136	2.26767	0.032865	0.824126	0.647033	1.50728	0.492345	2.75161	4e-05	1.50448	0.254903	0.546764	0.101681	hsa-miR-218
hsa-miR-494	28	0.000348008	17	6.21104e-05	47	0.000160473	8	8.74241e-05	0.178474	0	0.461118	0.001769	0.251213	0.000179	0.387047	0.000612	0.71045	0.487609	1.83557	0.115121	hsa-miR-494
hsa-miR-450a	6	7.45731e-05	36	0.000131528	48	0.000163887	8	8.74241e-05	1.76375	0.267589	2.19767	0.068084	1.17233	0.796499	0.802554	0.327975	1.50448	0.384112	1.87462	0.115533	hsa-miR-450a
hsa-miR-508-3p	0	0	66	0.000241135	143	0.000488246	57	0.000622896	-	-	-	-	-	-	0.493879	1e-06	0.387118	0	0.783832	0.134477	hsa-miR-508-3p
hsa-miR-217	0	0	0	0	1	3.41431e-06	2	2.1856e-05	-	-	-	-	-	-	0	1	0	0.06278	0.156218	0.143032	hsa-miR-217
hsa-miR-550*	0	0	2	7.30711e-06	1	3.41431e-06	2	2.1856e-05	-	-	-	-	-	-	2.14014	0.61275	0.33433	0.262663	0.156218	0.143032	hsa-miR-550*
hsa-let-7g	262	0.00325636	3794	0.0138616	3530	0.0120525	1158	0.0126546	4.25678	0	3.70123	0	3.88613	0	1.1501	0	1.09538	0.00613	0.952419	0.147317	hsa-let-7g
hsa-miR-188-5p	1	1.24288e-05	4	1.46142e-05	3	1.02429e-05	3	3.2784e-05	1.17583	1	0.824126	1	2.63774	0.628086	1.42676	0.718276	0.445773	0.377539	0.312437	0.151001	hsa-miR-188-5p
hsa-miR-320a	103	0.00128017	52	0.000189985	59	0.000201444	26	0.000284128	0.148406	0	0.157357	0	0.221945	0	0.943114	0.776454	0.668659	0.11558	0.708991	0.160299	hsa-miR-320a
hsa-miR-374b	0	0	12	4.38427e-05	11	3.75574e-05	7	7.6496e-05	-	-	-	-	-	-	1.16735	0.835449	0.573136	0.286724	0.490972	0.162715	hsa-miR-374b
hsa-miR-22*	28	0.000348008	30	0.000109607	31	0.000105844	15	0.00016392	0.314955	2.3e-05	0.304142	1e-05	0.471024	0.020887	1.03555	0.898861	0.668659	0.227296	0.645702	0.167024	hsa-miR-22*
hsa-miR-378	4	4.97154e-05	74	0.000270363	23	7.85291e-05	3	3.2784e-05	5.43822	3.7e-05	1.57957	0.489222	0.659434	0.712577	3.44284	0	8.2468	1e-06	2.39535	0.170936	hsa-miR-378
hsa-miR-335*	1	1.24288e-05	23	8.40318e-05	24	8.19434e-05	3	3.2784e-05	6.76103	0.027001	6.593	0.028171	2.63774	0.628086	1.02549	1	2.56319	0.171241	2.49949	0.172828	hsa-miR-335*
hsa-miR-335	13	0.000161575	548	0.00200215	434	0.00148181	154	0.00168291	12.3914	0	9.17104	0	10.4157	0	1.35115	3e-06	1.18969	0.060737	0.880503	0.175008	hsa-miR-335
hsa-miR-181a*	34	0.000422581	19	6.94176e-05	18	6.14576e-05	10	0.00010928	0.164271	0	0.145434	0	0.258602	5.3e-05	1.12952	0.744357	0.635226	0.282128	0.562386	0.179583	hsa-miR-181a*
hsa-miR-339-3p	13	0.000161575	27	9.8646e-05	26	8.8772e-05	13	0.000142064	0.610528	0.183854	0.549417	0.080303	0.879246	0.844884	1.11123	0.783773	0.694377	0.276215	0.624873	0.186508	hsa-miR-339-3p
hsa-miR-193a-5p	131	0.00162818	20	7.30711e-05	43	0.000146815	8	8.74241e-05	0.044879	0	0.0901715	0	0.0536944	0	0.497708	0.011095	0.835824	0.664533	1.67935	0.191888	hsa-miR-193a-5p
hsa-miR-223	0	0	330	0.00120567	1362	0.00465029	456	0.00498317	-	-	-	-	-	-	0.259268	0	0.241949	0	0.933199	0.204205	hsa-miR-223
hsa-miR-17*	7	8.70019e-05	19	6.94176e-05	14	4.78003e-05	8	8.74241e-05	0.797885	0.639538	0.549417	0.188824	1.00485	1	1.45224	0.301294	0.794033	0.656486	0.546764	0.207	hsa-miR-17*
hsa-miR-513a-5p	0	0	29	0.000105953	50	0.000170715	22	0.000240416	-	-	-	-	-	-	0.620641	0.042611	0.440707	0.005292	0.710083	0.211704	hsa-miR-513a-5p
hsa-miR-574-5p	181	0.00224962	68	0.000248442	110	0.000375574	26	0.000284128	0.110437	0	0.16695	0	0.1263	0	0.661499	0.006912	0.8744	0.552729	1.32185	0.226922	hsa-miR-574-5p
hsa-miR-33a*	3	3.72865e-05	6	2.19213e-05	5	1.70715e-05	4	4.3712e-05	0.587916	0.433924	0.457848	0.381611	1.17233	1	1.28409	0.768109	0.501494	0.281324	0.390546	0.230685	hsa-miR-33a*
hsa-miR-149	24	0.000298292	6	2.19213e-05	30	0.000102429	5	5.464e-05	0.0734894	0	0.343386	0.000175	0.183176	0.000106	0.214014	0.000149	0.401195	0.157412	1.87462	0.234822	hsa-miR-149
hsa-miR-509-5p	0	0	4	1.46142e-05	10	3.41431e-05	6	6.5568e-05	-	-	-	-	-	-	0.428029	0.183056	0.222886	0.019945	0.520728	0.236801	hsa-miR-509-5p
hsa-miR-181a-2*	14	0.000174004	18	6.5764e-05	10	3.41431e-05	6	6.5568e-05	0.377946	0.009407	0.19622	9.8e-05	0.37682	0.043891	1.92613	0.128884	1.00299	1	0.520728	0.236801	hsa-miR-181a-2*
hsa-miR-133a	0	0	0	0	0	0	1	1.0928e-05	-	-	-	-	-	-	-	-	0	0.25056	0	0.238058	hsa-miR-133a
hsa-miR-182*	0	0	0	0	0	0	1	1.0928e-05	-	-	-	-	-	-	-	-	0	0.25056	0	0.238058	hsa-miR-182*
hsa-miR-767-3p	0	0	0	0	0	0	1	1.0928e-05	-	-	-	-	-	-	-	-	0	0.25056	0	0.238058	hsa-miR-767-3p
hsa-miR-488	0	0	0	0	0	0	1	1.0928e-05	-	-	-	-	-	-	-	-	0	0.25056	0	0.238058	hsa-miR-488
hsa-miR-629*	0	0	0	0	0	0	1	1.0928e-05	-	-	-	-	-	-	-	-	0	0.25056	0	0.238058	hsa-miR-629*
hsa-miR-548a-3p	0	0	0	0	0	0	1	1.0928e-05	-	-	-	-	-	-	-	-	0	0.25056	0	0.238058	hsa-miR-548a-3p
hsa-miR-935	13	0.000161575	1	3.65356e-06	0	0	1	1.0928e-05	0.0226121	0	0	0	0.0676343	0.000553	-	-	0.33433	0.43834	0	0.238058	hsa-miR-935
hsa-miR-501-5p	1	1.24288e-05	1	3.65356e-06	0	0	1	1.0928e-05	0.293958	0.402745	0	0.215507	0.879246	1	-	-	0.33433	0.43834	0	0.238058	hsa-miR-501-5p
hsa-miR-20b*	0	0	1	3.65356e-06	0	0	1	1.0928e-05	-	-	-	-	-	-	-	-	0.33433	0.43834	0	0.238058	hsa-miR-20b*
hsa-miR-216a	0	0	1	3.65356e-06	0	0	1	1.0928e-05	-	-	-	-	-	-	-	-	0.33433	0.43834	0	0.238058	hsa-miR-216a
hsa-miR-502-5p	0	0	1	3.65356e-06	0	0	1	1.0928e-05	-	-	-	-	-	-	-	-	0.33433	0.43834	0	0.238058	hsa-miR-502-5p
hsa-miR-155*	0	0	1	3.65356e-06	0	0	1	1.0928e-05	-	-	-	-	-	-	-	-	0.33433	0.43834	0	0.238058	hsa-miR-155*
hsa-miR-767-5p	0	0	0	0	2	6.82862e-06	2	2.1856e-05	-	-	-	-	-	-	0	0.500572	0	0.06278	0.312437	0.241736	hsa-miR-767-5p
hsa-miR-23a*	8	9.94308e-05	2	7.30711e-06	2	6.82862e-06	2	2.1856e-05	0.0734894	0.000203	0.0686771	0.000137	0.219811	0.053298	1.07007	1	0.33433	0.262663	0.312437	0.241736	hsa-miR-23a*
hsa-miR-19b-1*	1	1.24288e-05	3	1.09607e-05	2	6.82862e-06	2	2.1856e-05	0.881873	1	0.549417	0.517201	1.75849	1	1.60511	0.677661	0.501494	0.604787	0.312437	0.241736	hsa-miR-19b-1*
hsa-miR-421	0	0	3	1.09607e-05	2	6.82862e-06	2	2.1856e-05	-	-	-	-	-	-	1.60511	0.677661	0.501494	0.604787	0.312437	0.241736	hsa-miR-421
hsa-miR-187	0	0	6	2.19213e-05	2	6.82862e-06	2	2.1856e-05	-	-	-	-	-	-	3.21021	0.166646	1.00299	1	0.312437	0.241736	hsa-miR-187
hsa-miR-744	61	0.00075816	11	4.01891e-05	42	0.000143401	8	8.74241e-05	0.0530088	0	0.189144	0	0.115311	0	0.280257	4.6e-05	0.459703	0.108974	1.64029	0.244957	hsa-miR-744
hsa-miR-369-3p	5	6.21442e-05	11	4.01891e-05	18	6.14576e-05	9	9.83521e-05	0.646707	0.381752	0.988951	1	1.58264	0.437424	0.653933	0.35312	0.408625	0.065481	0.624873	0.259051	hsa-miR-369-3p
hsa-miR-99b*	9	0.00011186	6	2.19213e-05	6	2.04859e-05	4	4.3712e-05	0.195972	0.002066	0.183139	0.001389	0.390776	0.162514	1.07007	1	0.501494	0.281324	0.468655	0.262869	hsa-miR-99b*
hsa-miR-192	3	3.72865e-05	101	0.000369009	151	0.000515561	38	0.000415264	9.89658	0	13.827	0	11.1371	0	0.715743	0.00964	0.888613	0.556902	1.24152	0.266569	hsa-miR-192
hsa-miR-513b	0	0	26	9.49924e-05	68	0.000232173	27	0.000295056	-	-	-	-	-	-	0.409145	7e-05	0.321947	5e-05	0.786877	0.280333	hsa-miR-513b
hsa-miR-221	1859	0.0231052	907	0.00331377	787	0.00268706	226	0.00246973	0.143421	0	0.116297	0	0.106891	0	1.23323	1.6e-05	1.34176	5.8e-05	1.088	0.284044	hsa-miR-221
hsa-miR-28-3p	51	0.000633871	51	0.000186331	81	0.000276559	19	0.000207632	0.293958	0	0.436302	1e-05	0.327562	1.1e-05	0.673749	0.029183	0.897411	0.679901	1.33197	0.291597	hsa-miR-28-3p
hsa-miR-301b	5	6.21442e-05	7	2.55749e-05	7	2.39002e-05	4	4.3712e-05	0.411541	0.1596	0.384592	0.149294	0.703396	0.742385	1.07007	1	0.585077	0.484176	0.546764	0.30463	hsa-miR-301b
hsa-miR-141*	0	0	59	0.00021556	22	7.51148e-05	10	0.00010928	-	-	-	-	-	-	2.86974	1e-05	1.97254	0.050552	0.687361	0.305302	hsa-miR-141*
hsa-miR-513c	0	0	24	8.76853e-05	96	0.000327774	37	0.000404336	-	-	-	-	-	-	0.267518	0	0.216862	0	0.810646	0.308055	hsa-miR-513c
hsa-miR-874	8	9.94308e-05	10	3.65356e-05	14	4.78003e-05	7	7.6496e-05	0.367447	0.043524	0.48074	0.11537	0.76934	0.61735	0.764337	0.546842	0.477614	0.15773	0.624873	0.308506	hsa-miR-874
hsa-miR-340*	0	0	10	3.65356e-05	20	6.82862e-05	3	3.2784e-05	-	-	-	-	-	-	0.535036	0.142636	1.11443	1	2.08291	0.327157	hsa-miR-340*
hsa-miR-423-5p	39	0.000484725	29	0.000105953	43	0.000146815	9	9.83521e-05	0.218584	0	0.302884	0	0.202903	1e-06	0.721676	0.194853	1.07728	1	1.49275	0.329676	hsa-miR-423-5p
hsa-miR-132	40	0.000497154	21	7.67247e-05	59	0.000201444	13	0.000142064	0.154328	0	0.405195	2.3e-05	0.285755	2.5e-05	0.380873	7.2e-05	0.540071	0.110316	1.41798	0.331844	hsa-miR-132
hsa-miR-124	2	2.48577e-05	4	1.46142e-05	3	1.02429e-05	2	2.1856e-05	0.587916	0.624233	0.412063	0.29475	0.879246	1	1.42676	0.718276	0.668659	0.644574	0.468655	0.342011	hsa-miR-124
hsa-let-7d*	6	7.45731e-05	8	2.92284e-05	3	1.02429e-05	2	2.1856e-05	0.391944	0.102851	0.137354	0.004574	0.293082	0.157995	2.85352	0.134679	1.33732	1	0.468655	0.342011	hsa-let-7d*
hsa-miR-142-5p	0	0	214	0.000781861	236	0.000805777	64	0.000699392	-	-	-	-	-	-	0.970319	0.777141	1.11791	0.488649	1.15211	0.342562	hsa-miR-142-5p
hsa-miR-126*	3	3.72865e-05	232	0.000847625	351	0.00119842	98	0.00107094	22.7327	0	32.1409	0	28.722	0	0.707284	3.9e-05	0.791474	0.056418	1.11903	0.34609	hsa-miR-126*
hsa-miR-99a*	1	1.24288e-05	30	0.000109607	34	0.000116087	7	7.6496e-05	8.81873	0.004929	9.34009	0.003407	6.15472	0.074831	0.944181	0.900621	1.43284	0.453102	1.51755	0.363787	hsa-miR-99a*
hsa-miR-7-1*	2	2.48577e-05	29	0.000105953	18	6.14576e-05	8	8.74241e-05	4.26239	0.030352	2.47238	0.281827	3.51698	0.116623	1.724	0.079296	1.21194	0.708509	0.702982	0.367108	hsa-miR-7-1*
hsa-miR-153	0	0	0	0	4	1.36572e-05	3	3.2784e-05	-	-	-	-	-	-	0	0.125858	0	0.01573	0.416582	0.368296	hsa-miR-153
hsa-miR-411	0	0	1	3.65356e-06	4	1.36572e-05	3	3.2784e-05	-	-	-	-	-	-	0.267518	0.376429	0.111443	0.051096	0.416582	0.368296	hsa-miR-411
hsa-miR-100	226	0.00280892	118	0.00043112	45	0.000153644	18	0.000196704	0.153482	0	0.0546986	0	0.0700284	0	2.80597	0	2.19172	0.001006	0.781092	0.375752	hsa-miR-100
hsa-miR-484	3	3.72865e-05	28	0.0001023	31	0.000105844	13	0.000142064	2.74361	0.089006	2.83865	0.092463	3.81006	0.025446	0.966516	1	0.720094	0.366535	0.745041	0.377117	hsa-miR-484
hsa-miR-194	4	4.97154e-05	67	0.000244788	93	0.000317531	23	0.000251344	4.92379	0.000174	6.38697	3e-06	5.05566	0.000744	0.770912	0.113506	0.973916	0.903411	1.26333	0.382703	hsa-miR-194
hsa-miR-500	4	4.97154e-05	9	3.2882e-05	14	4.78003e-05	2	2.1856e-05	0.661405	0.508728	0.96148	1	0.439623	0.428072	0.687903	0.411086	1.50448	0.741702	2.18706	0.387964	hsa-miR-500
hsa-miR-509-3-5p	0	0	10	3.65356e-05	14	4.78003e-05	2	2.1856e-05	-	-	-	-	-	-	0.764337	0.546842	1.67165	0.741895	2.18706	0.387964	hsa-miR-509-3-5p
hsa-miR-361-5p	12	0.000149146	107	0.00039093	111	0.000378988	41	0.000448048	2.62112	0.000607	2.54105	0.000894	3.00409	0.000458	1.03151	0.839052	0.872519	0.448823	0.845865	0.390975	hsa-miR-361-5p
hsa-miR-301a	5	6.21442e-05	65	0.000237481	66	0.000225344	25	0.0002732	3.82145	0.000881	3.62615	0.001379	4.39623	0.000773	1.05386	0.793435	0.869257	0.544064	0.824833	0.39139	hsa-miR-301a
hsa-miR-542-3p	19	0.000236148	50	0.000182678	75	0.000256073	18	0.000196704	0.773573	0.318237	1.08438	0.900098	0.832969	0.623197	0.713381	0.073077	0.928693	0.780186	1.30182	0.393521	hsa-miR-542-3p
hsa-miR-532-3p	33	0.000410152	48	0.000175371	124	0.000423374	32	0.000349696	0.427575	0.000281	1.03224	0.922926	0.852602	0.536385	0.414221	0	0.501494	0.004099	1.21069	0.397162	hsa-miR-532-3p
hsa-miR-590-3p	0	0	6	2.19213e-05	5	1.70715e-05	3	3.2784e-05	-	-	-	-	-	-	1.28409	0.768109	0.668659	0.699884	0.520728	0.405562	hsa-miR-590-3p
hsa-miR-34c-5p	0	0	33	0.000120567	1	3.41431e-06	1	1.0928e-05	-	-	-	-	-	-	35.3124	0	11.0329	0.001134	0.312437	0.419446	hsa-miR-34c-5p
hsa-miR-496	3	3.72865e-05	0	0	1	3.41431e-06	1	1.0928e-05	0	0.011724	0.0915695	0.033564	0.293082	0.346094	0	1	0	0.25056	0.312437	0.419446	hsa-miR-496
hsa-miR-1254	2	2.48577e-05	0	0	1	3.41431e-06	1	1.0928e-05	0	0.051609	0.137354	0.119311	0.439623	0.602549	0	1	0	0.25056	0.312437	0.419446	hsa-miR-1254
hsa-let-7f-2*	2	2.48577e-05	0	0	1	3.41431e-06	1	1.0928e-05	0	0.051609	0.137354	0.119311	0.439623	0.602549	0	1	0	0.25056	0.312437	0.419446	hsa-let-7f-2*
hsa-miR-624*	0	0	0	0	1	3.41431e-06	1	1.0928e-05	-	-	-	-	-	-	0	1	0	0.25056	0.312437	0.419446	hsa-miR-624*
hsa-miR-30b*	0	0	0	0	1	3.41431e-06	1	1.0928e-05	-	-	-	-	-	-	0	1	0	0.25056	0.312437	0.419446	hsa-miR-30b*
hsa-miR-1277	0	0	2	7.30711e-06	1	3.41431e-06	1	1.0928e-05	-	-	-	-	-	-	2.14014	0.61275	0.668659	1	0.312437	0.419446	hsa-miR-1277
hsa-miR-516a-5p	0	0	2	7.30711e-06	1	3.41431e-06	1	1.0928e-05	-	-	-	-	-	-	2.14014	0.61275	0.668659	1	0.312437	0.419446	hsa-miR-516a-5p
hsa-miR-320b	0	0	3	1.09607e-05	1	3.41431e-06	1	1.0928e-05	-	-	-	-	-	-	3.21021	0.358952	1.00299	1	0.312437	0.419446	hsa-miR-320b
hsa-miR-33b	0	0	4	1.46142e-05	1	3.41431e-06	1	1.0928e-05	-	-	-	-	-	-	4.28029	0.203967	1.33732	1	0.312437	0.419446	hsa-miR-33b
hsa-miR-145*	0	0	5	1.82678e-05	6	2.04859e-05	3	3.2784e-05	-	-	-	-	-	-	0.891726	1	0.557216	0.422366	0.624873	0.452436	hsa-miR-145*
hsa-miR-148b	34	0.000422581	92	0.000336127	158	0.000539461	43	0.000469904	0.795415	0.243806	1.27659	0.219008	1.11199	0.732096	0.62308	0.000293	0.71531	0.07371	1.14802	0.456589	hsa-miR-148b
hsa-miR-197	22	0.000273435	25	9.13389e-05	32	0.000109258	7	7.6496e-05	0.334043	0.000318	0.399576	0.001384	0.27976	0.002294	0.835993	0.511283	1.19403	0.838956	1.42828	0.456855	hsa-miR-197
hsa-miR-369-5p	5	6.21442e-05	0	0	9	3.07288e-05	1	1.0928e-05	0	0.000605	0.494475	0.198811	0.175849	0.10477	0	0.004068	0	0.25056	2.81193	0.468921	hsa-miR-369-5p
hsa-miR-29b-2*	5	6.21442e-05	7	2.55749e-05	9	3.07288e-05	1	1.0928e-05	0.411541	0.1596	0.494475	0.198811	0.175849	0.10477	0.832278	0.80541	2.34031	0.688536	2.81193	0.468921	hsa-miR-29b-2*
hsa-miR-769-5p	6	7.45731e-05	16	5.84569e-05	10	3.41431e-05	1	1.0928e-05	0.783887	0.612189	0.457848	0.13035	0.146541	0.056057	1.71211	0.238603	5.34927	0.090337	3.12437	0.477328	hsa-miR-769-5p
hsa-miR-339-5p	46	0.000571727	82	0.000299592	107	0.000365331	28	0.000305984	0.524012	0.000673	0.638996	0.013624	0.535193	0.009935	0.820055	0.190162	0.979108	0.912568	1.19395	0.479063	hsa-miR-339-5p
hsa-miR-299-5p	6	7.45731e-05	16	5.84569e-05	35	0.000119501	8	8.74241e-05	0.783887	0.612189	1.60247	0.345003	1.17233	0.796499	0.489176	0.01689	0.668659	0.349645	1.36691	0.47952	hsa-miR-299-5p
hsa-miR-32*	0	0	9	3.2882e-05	8	2.73145e-05	4	4.3712e-05	-	-	-	-	-	-	1.20383	0.809999	0.752241	0.748535	0.624873	0.496415	hsa-miR-32*
hsa-miR-92b	5	6.21442e-05	67	0.000244788	60	0.000204859	15	0.00016392	3.93903	0.000612	3.2965	0.003958	2.63774	0.070884	1.19491	0.329578	1.49334	0.20155	1.24975	0.499496	hsa-miR-92b
hsa-miR-455-5p	5	6.21442e-05	8	2.92284e-05	20	6.82862e-05	8	8.74241e-05	0.470332	0.187401	1.09883	1	1.40679	0.591313	0.428029	0.038624	0.33433	0.037384	0.781092	0.512244	hsa-miR-455-5p
hsa-miR-629	16	0.000198862	3	1.09607e-05	9	3.07288e-05	4	4.3712e-05	0.0551171	0	0.154524	6e-06	0.219811	0.003087	0.356691	0.14876	0.250747	0.071073	0.702982	0.5234	hsa-miR-629
hsa-miR-151-5p	170	0.0021129	257	0.000938964	393	0.00134182	114	0.00124579	0.444395	0	0.635061	2e-06	0.589612	1.3e-05	0.699767	7e-06	0.753708	0.013862	1.07708	0.531196	hsa-miR-151-5p
hsa-miR-508-5p	0	0	4	1.46142e-05	13	4.4386e-05	2	2.1856e-05	-	-	-	-	-	-	0.329253	0.051206	0.668659	0.644574	2.03084	0.544667	hsa-miR-508-5p
hsa-miR-98	88	0.00109374	279	0.00101934	355	0.00121208	103	0.00112558	0.93198	0.574824	1.1082	0.418366	1.02912	0.884718	0.840986	0.031735	0.905611	0.40816	1.07684	0.546009	hsa-miR-98
hsa-miR-514	0	0	11	4.01891e-05	11	3.75574e-05	5	5.464e-05	-	-	-	-	-	-	1.07007	1	0.735525	0.567543	0.687361	0.555785	hsa-miR-514
hsa-miR-758	2	2.48577e-05	0	0	2	6.82862e-06	1	1.0928e-05	0	0.051609	0.274709	0.205059	0.439623	0.602549	0	0.500572	0	0.25056	0.624873	0.557652	hsa-miR-758
hsa-miR-652	3	3.72865e-05	1	3.65356e-06	2	6.82862e-06	1	1.0928e-05	0.0979859	0.038907	0.183139	0.070522	0.293082	0.346094	0.535036	1	0.33433	0.43834	0.624873	0.557652	hsa-miR-652
hsa-miR-1179	0	0	1	3.65356e-06	2	6.82862e-06	1	1.0928e-05	-	-	-	-	-	-	0.535036	1	0.33433	0.43834	0.624873	0.557652	hsa-miR-1179
hsa-miR-186*	0	0	1	3.65356e-06	2	6.82862e-06	1	1.0928e-05	-	-	-	-	-	-	0.535036	1	0.33433	0.43834	0.624873	0.557652	hsa-miR-186*
hsa-miR-454*	0	0	2	7.30711e-06	2	6.82862e-06	1	1.0928e-05	-	-	-	-	-	-	1.07007	1	0.668659	1	0.624873	0.557652	hsa-miR-454*
hsa-miR-139-5p	1	1.24288e-05	3	1.09607e-05	15	5.12146e-05	3	3.2784e-05	0.881873	1	4.12063	0.220798	2.63774	0.628086	0.214014	0.008129	0.33433	0.170319	1.56218	0.590429	hsa-miR-139-5p
hsa-miR-542-5p	8	9.94308e-05	4	1.46142e-05	15	5.12146e-05	3	3.2784e-05	0.146979	0.001431	0.515078	0.129936	0.329717	0.12851	0.285352	0.020485	0.445773	0.377539	1.56218	0.590429	hsa-miR-542-5p
hsa-miR-28-5p	18	0.000223719	27	9.8646e-05	31	0.000105844	12	0.000131136	0.440937	0.011256	0.473109	0.014213	0.586164	0.199496	0.931998	0.794707	0.752241	0.459059	0.807128	0.590585	hsa-miR-28-5p
hsa-miR-664	0	0	20	7.30711e-05	14	4.78003e-05	6	6.5568e-05	-	-	-	-	-	-	1.52867	0.233918	1.11443	1	0.729019	0.598421	hsa-miR-664
hsa-miR-941	0	0	1	3.65356e-06	4	1.36572e-05	2	2.1856e-05	-	-	-	-	-	-	0.267518	0.376429	0.167165	0.15688	0.624873	0.633187	hsa-miR-941
hsa-miR-1180	2	2.48577e-05	2	7.30711e-06	4	1.36572e-05	2	2.1856e-05	0.293958	0.223851	0.549417	0.615797	0.879246	1	0.535036	0.688571	0.33433	0.262663	0.624873	0.633187	hsa-miR-1180
hsa-miR-30e*	7	8.70019e-05	66	0.000241135	19	6.48719e-05	7	7.6496e-05	2.7716	0.005026	0.745637	0.478565	0.879246	1	3.71709	0	3.15225	0.001626	0.848042	0.651055	hsa-miR-30e*
hsa-miR-130b	87	0.00108131	56	0.000204599	49	0.000167301	13	0.000142064	0.189214	0	0.154721	0	0.131382	0	1.22294	0.329223	1.44019	0.267768	1.17765	0.657692	hsa-miR-130b
hsa-miR-22	160	0.00198862	47	0.000171717	54	0.000184373	14	0.000152992	0.0863501	0	0.0927141	0	0.076934	0	0.931359	0.765564	1.12239	0.769556	1.20511	0.669053	hsa-miR-22
hsa-miR-30e	14	0.000174004	576	0.00210445	312	0.00106526	92	0.00100538	12.0943	0	6.12208	0	5.7779	0	1.97552	0	2.09319	0	1.05957	0.682451	hsa-miR-30e
hsa-miR-934	0	0	42	0.000153449	7	2.39002e-05	1	1.0928e-05	-	-	-	-	-	-	6.42043	0	14.0418	0.000125	2.18706	0.689501	hsa-miR-934
hsa-miR-299-3p	2	2.48577e-05	0	0	7	2.39002e-05	1	1.0928e-05	0	0.051609	0.96148	1	0.439623	0.602549	0	0.016001	0	0.25056	2.18706	0.689501	hsa-miR-299-3p
hsa-miR-136*	1	1.24288e-05	6	2.19213e-05	7	2.39002e-05	1	1.0928e-05	1.76375	1	1.92296	1	0.879246	1	0.917204	1	2.00598	0.688304	2.18706	0.689501	hsa-miR-136*
hsa-miR-337-5p	2	2.48577e-05	0	0	8	2.73145e-05	1	1.0928e-05	0	0.051609	1.09883	1	0.439623	0.602549	0	0.008063	0	0.25056	2.49949	0.695823	hsa-miR-337-5p
hsa-miR-655	0	0	1	3.65356e-06	8	2.73145e-05	1	1.0928e-05	-	-	-	-	-	-	0.133759	0.040029	0.33433	0.43834	2.49949	0.695823	hsa-miR-655
hsa-miR-1246	0	0	7	2.55749e-05	8	2.73145e-05	1	1.0928e-05	-	-	-	-	-	-	0.936313	1	2.34031	0.688536	2.49949	0.695823	hsa-miR-1246
hsa-miR-381	1	1.24288e-05	2	7.30711e-06	8	2.73145e-05	1	1.0928e-05	0.587916	0.538429	2.19767	0.694259	0.879246	1	0.267518	0.111386	0.668659	1	2.49949	0.695823	hsa-miR-381
hsa-miR-376c	9	0.00011186	16	5.84569e-05	28	9.56007e-05	10	0.00010928	0.522592	0.147775	0.854649	0.689475	0.976939	1	0.611469	0.131596	0.534927	0.11746	0.874823	0.704595	hsa-miR-376c
hsa-miR-92a	16	0.000198862	378	0.00138104	378	0.00129061	123	0.00134414	6.94475	0	6.48999	0	6.7592	0	1.07007	0.362683	1.02745	0.836555	0.960171	0.713296	hsa-miR-92a
hsa-miR-509-3p	0	0	53	0.000193638	154	0.000525804	51	0.000557328	-	-	-	-	-	-	0.368271	0	0.34744	0	0.943436	0.742803	hsa-miR-509-3p
hsa-miR-95	0	0	14	5.11498e-05	10	3.41431e-05	2	2.1856e-05	-	-	-	-	-	-	1.4981	0.414813	2.34031	0.386844	1.56218	0.743093	hsa-miR-95
hsa-miR-424*	10	0.000124288	2	7.30711e-06	14	4.78003e-05	3	3.2784e-05	0.0587916	1.5e-05	0.384592	0.02402	0.263774	0.047609	0.152867	0.004506	0.222886	0.104106	1.45804	0.777001	hsa-miR-424*
hsa-miR-592	0	0	3	1.09607e-05	14	4.78003e-05	3	3.2784e-05	-	-	-	-	-	-	0.229301	0.013561	0.33433	0.170319	1.45804	0.777001	hsa-miR-592
hsa-miR-330-3p	12	0.000149146	8	2.92284e-05	13	4.4386e-05	5	5.464e-05	0.195972	0.000367	0.297601	0.003013	0.366352	0.054644	0.658506	0.38906	0.534927	0.333227	0.812335	0.781542	hsa-miR-330-3p
hsa-miR-495	10	0.000124288	16	5.84569e-05	13	4.4386e-05	5	5.464e-05	0.470332	0.062646	0.357121	0.018927	0.439623	0.194188	1.31701	0.465435	1.06985	1	0.812335	0.781542	hsa-miR-495
hsa-miR-186	37	0.000459867	88	0.000321513	56	0.000191201	19	0.000207632	0.699143	0.069787	0.415775	6.9e-05	0.451504	0.004567	1.68154	0.002562	1.54847	0.093626	0.920866	0.786213	hsa-miR-186
hsa-miR-210	697	0.0086629	77	0.000281324	140	0.000478003	46	0.000502688	0.0324745	0	0.0551782	0	0.0580277	0	0.588539	0.000173	0.559639	0.002413	0.950894	0.796119	hsa-miR-210
hsa-miR-506	0	0	6	2.19213e-05	17	5.80433e-05	4	4.3712e-05	-	-	-	-	-	-	0.377672	0.037038	0.501494	0.281324	1.32786	0.79922	hsa-miR-506
hsa-miR-337-3p	15	0.000186433	39	0.000142489	70	0.000239002	20	0.00021856	0.76429	0.415764	1.28197	0.430576	1.17233	0.735665	0.596183	0.009479	0.651943	0.13216	1.09353	0.805046	hsa-miR-337-3p
hsa-miR-126	11	0.000136717	539	0.00196927	670	0.00228759	213	0.00232767	14.4039	0	16.7322	0	17.0254	0	0.860849	0.009519	0.846026	0.04308	0.982782	0.812514	hsa-miR-126
hsa-miR-155	2	2.48577e-05	63	0.000230174	23	7.85291e-05	6	6.5568e-05	9.25967	1.9e-05	3.15915	0.141277	2.63774	0.297152	2.93107	4e-06	3.51046	0.000777	1.19767	0.829227	hsa-miR-155
hsa-miR-106b*	5	6.21442e-05	19	6.94176e-05	26	8.8772e-05	9	9.83521e-05	1.11704	1	1.42848	0.661575	1.58264	0.437424	0.781975	0.457681	0.705807	0.386048	0.902595	0.842565	hsa-miR-106b*
hsa-miR-29c*	13	0.000161575	93	0.000339781	58	0.00019803	17	0.000185776	2.10293	0.010212	1.22562	0.566451	1.14978	0.719439	1.7158	0.001096	1.82898	0.020359	1.06596	0.892747	hsa-miR-29c*
hsa-miR-590-5p	14	0.000174004	78	0.000284977	74	0.000252659	22	0.000240416	1.63776	0.104664	1.45203	0.24267	1.38167	0.404847	1.12791	0.466194	1.18535	0.564	1.05092	0.905024	hsa-miR-590-5p
hsa-miR-26a	126	0.00156603	3990	0.0145777	2992	0.0102156	932	0.0101849	9.30866	0	6.52324	0	6.50363	0	1.427	0	1.4313	0	1.00302	0.954933	hsa-miR-26a
hsa-let-7i*	6	7.45731e-05	15	5.48033e-05	6	2.04859e-05	2	2.1856e-05	0.734894	0.601154	0.274709	0.027642	0.293082	0.157995	2.67518	0.047235	2.50747	0.270556	0.93731	1	hsa-let-7i*
hsa-miR-132*	5	6.21442e-05	4	1.46142e-05	6	2.04859e-05	2	2.1856e-05	0.235166	0.033247	0.32965	0.066913	0.351698	0.263727	0.713381	0.755311	0.668659	0.644574	0.93731	1	hsa-miR-132*
hsa-miR-502-3p	2	2.48577e-05	4	1.46142e-05	6	2.04859e-05	2	2.1856e-05	0.587916	0.624233	0.824126	0.684734	0.879246	1	0.713381	0.755311	0.668659	0.644574	0.93731	1	hsa-miR-502-3p
hsa-miR-493	79	0.000981879	4	1.46142e-05	12	4.09717e-05	4	4.3712e-05	0.0148839	0	0.0417279	0	0.0445188	0	0.356691	0.079483	0.33433	0.11459	0.93731	1	hsa-miR-493
hsa-miR-328	6	7.45731e-05	11	4.01891e-05	9	3.07288e-05	3	3.2784e-05	0.538923	0.244482	0.412063	0.109444	0.439623	0.320553	1.30787	0.656356	1.22587	1	0.93731	1	hsa-miR-328
hsa-miR-485-5p	10	0.000124288	0	0	3	1.02429e-05	1	1.0928e-05	0	0	0.0824126	3.2e-05	0.0879246	0.004145	0	0.250858	0	0.25056	0.93731	1	hsa-miR-485-5p
hsa-miR-144*	0	0	0	0	3	1.02429e-05	1	1.0928e-05	-	-	-	-	-	-	0	0.250858	0	0.25056	0.93731	1	hsa-miR-144*
hsa-miR-219-5p	0	0	4	1.46142e-05	3	1.02429e-05	1	1.0928e-05	-	-	-	-	-	-	1.42676	0.718276	1.33732	1	0.93731	1	hsa-miR-219-5p
hsa-miR-409-3p	142	0.0017649	12	4.38427e-05	25	8.53577e-05	8	8.74241e-05	0.0248415	0	0.0483642	0	0.049535	0	0.513634	0.069157	0.501494	0.126912	0.976364	1	hsa-miR-409-3p
hsa-miR-15b*	3	3.72865e-05	33	0.000120567	22	7.51148e-05	7	7.6496e-05	3.23354	0.044571	2.01453	0.332938	2.05157	0.353841	1.60511	0.104626	1.57612	0.361176	0.981944	1	hsa-miR-15b*
hsa-miR-361-3p	4	4.97154e-05	27	9.8646e-05	41	0.000139987	13	0.000142064	1.98421	0.281857	2.81576	0.044155	2.85755	0.085922	0.704681	0.181851	0.694377	0.276215	0.985377	1	hsa-miR-361-3p
hsa-miR-136	144	0.00178975	103	0.000376316	224	0.000764805	70	0.00076496	0.210261	0	0.427324	0	0.427411	0	0.492042	0	0.491942	9e-06	0.999797	1	hsa-miR-136
hsa-miR-510	0	0	7	2.55749e-05	32	0.000109258	10	0.00010928	-	-	-	-	-	-	0.234078	0.000146	0.234031	0.003156	0.999797	1	hsa-miR-510
hsa-miR-424	35	0.00043501	232	0.000847625	286	0.000976492	89	0.000972593	1.94852	9.8e-05	2.24476	1e-06	2.2358	2.9e-05	0.86803	0.113349	0.871511	0.273475	1.00401	1	hsa-miR-424
hsa-miR-331-3p	69	0.00085759	129	0.000471309	162	0.000553118	50	0.0005464	0.549573	0.000118	0.644968	0.002973	0.637134	0.016599	0.852094	0.177662	0.86257	0.388254	1.01229	1	hsa-miR-331-3p
hsa-miR-362-5p	10	0.000124288	32	0.000116914	39	0.000133158	12	0.000131136	0.940665	0.854396	1.07136	1	1.05509	1	0.878007	0.635538	0.891545	0.728927	1.01542	1	hsa-miR-362-5p
hsa-miR-362-3p	2	2.48577e-05	22	8.03782e-05	30	0.000102429	9	9.83521e-05	3.23354	0.139745	4.12063	0.031512	3.9566	0.071425	0.784719	0.408111	0.81725	0.678154	1.04146	1	hsa-miR-362-3p
hsa-miR-423-3p	20	0.000248577	16	5.84569e-05	27	9.21864e-05	8	8.74241e-05	0.235166	2e-05	0.370856	0.001138	0.351698	0.01246	0.634116	0.170022	0.668659	0.349645	1.05447	1	hsa-miR-423-3p
hsa-miR-154	29	0.000360437	13	4.74962e-05	41	0.000139987	12	0.000131136	0.131774	0	0.388381	0.000198	0.363826	0.002566	0.339291	0.00033	0.36219	0.017842	1.06749	1	hsa-miR-154
hsa-miR-379	103	0.00128017	39	0.000142489	41	0.000139987	12	0.000131136	0.111304	0	0.10935	0	0.102436	0	1.01787	1	1.08657	0.873022	1.06749	1	hsa-miR-379
hsa-miR-671-5p	2	2.48577e-05	35	0.000127874	14	4.78003e-05	4	4.3712e-05	5.14426	0.009435	1.92296	0.547786	1.75849	0.69135	2.67518	0.001424	2.92538	0.039879	1.09353	1	hsa-miR-671-5p
hsa-miR-432	5	6.21442e-05	0	0	7	2.39002e-05	2	2.1856e-05	0	0.000605	0.384592	0.149294	0.351698	0.263727	0	0.016001	0	0.06278	1.09353	1	hsa-miR-432
hsa-miR-93*	4	4.97154e-05	12	4.38427e-05	7	2.39002e-05	2	2.1856e-05	0.881873	0.769682	0.48074	0.266331	0.439623	0.428072	1.83441	0.251938	2.00598	0.53962	1.09353	1	hsa-miR-93*
hsa-let-7a*	15	0.000186433	4	1.46142e-05	7	2.39002e-05	2	2.1856e-05	0.0783887	0	0.128197	4e-06	0.117233	0.000834	0.611469	0.551403	0.668659	0.644574	1.09353	1	hsa-let-7a*
hsa-miR-10b*	0	0	7	2.55749e-05	7	2.39002e-05	2	2.1856e-05	-	-	-	-	-	-	1.07007	1	1.17015	1	1.09353	1	hsa-miR-10b*
hsa-miR-664*	4	4.97154e-05	4	1.46142e-05	12	4.09717e-05	3	3.2784e-05	0.293958	0.084646	0.824126	0.761088	0.659434	0.712577	0.356691	0.079483	0.445773	0.377539	1.24975	1	hsa-miR-664*
hsa-miR-665	5	6.21442e-05	1	3.65356e-06	4	1.36572e-05	1	1.0928e-05	0.0587916	0.002943	0.219767	0.026757	0.175849	0.10477	0.267518	0.376429	0.33433	0.43834	1.24975	1	hsa-miR-665
hsa-miR-30c-2*	0	0	2	7.30711e-06	4	1.36572e-05	1	1.0928e-05	-	-	-	-	-	-	0.535036	0.688571	0.668659	1	1.24975	1	hsa-miR-30c-2*
hsa-miR-376a*	0	0	2	7.30711e-06	4	1.36572e-05	1	1.0928e-05	-	-	-	-	-	-	0.535036	0.688571	0.668659	1	1.24975	1	hsa-miR-376a*
hsa-miR-450b-5p	0	0	2	7.30711e-06	4	1.36572e-05	1	1.0928e-05	-	-	-	-	-	-	0.535036	0.688571	0.668659	1	1.24975	1	hsa-miR-450b-5p
hsa-miR-513a-3p	0	0	3	1.09607e-05	4	1.36572e-05	1	1.0928e-05	-	-	-	-	-	-	0.802554	1	1.00299	1	1.24975	1	hsa-miR-513a-3p
hsa-miR-26b*	0	0	3	1.09607e-05	4	1.36572e-05	1	1.0928e-05	-	-	-	-	-	-	0.802554	1	1.00299	1	1.24975	1	hsa-miR-26b*
hsa-miR-16-2*	0	0	5	1.82678e-05	4	1.36572e-05	1	1.0928e-05	-	-	-	-	-	-	1.33759	0.746738	1.67165	1	1.24975	1	hsa-miR-16-2*
hsa-miR-493*	6	7.45731e-05	15	5.48033e-05	9	3.07288e-05	2	2.1856e-05	0.734894	0.601154	0.412063	0.109444	0.293082	0.157995	1.78345	0.219931	2.50747	0.270556	1.40596	1	hsa-miR-493*
hsa-miR-34a*	0	0	1	3.65356e-06	5	1.70715e-05	1	1.0928e-05	-	-	-	-	-	-	0.214014	0.220358	0.33433	0.43834	1.56218	1	hsa-miR-34a*
hsa-miR-16-1*	1	1.24288e-05	6	2.19213e-05	5	1.70715e-05	1	1.0928e-05	1.76375	1	1.37354	1	0.879246	1	1.28409	0.768109	2.00598	0.688304	1.56218	1	hsa-miR-16-1*
hsa-miR-27a*	11	0.000136717	7	2.55749e-05	5	1.70715e-05	1	1.0928e-05	0.187064	0.000522	0.124868	6.8e-05	0.0799314	0.002127	1.4981	0.570466	2.34031	0.688536	1.56218	1	hsa-miR-27a*
hsa-miR-504	0	0	3	1.09607e-05	5	1.70715e-05	1	1.0928e-05	-	-	-	-	-	-	0.642043	0.727812	1.00299	1	1.56218	1	hsa-miR-504
hsa-miR-379*	1	1.24288e-05	0	0	6	2.04859e-05	1	1.0928e-05	0	0.227177	1.64825	1	0.879246	1	0	0.031787	0	0.25056	1.87462	1	hsa-miR-379*
hsa-let-7e*	1	1.24288e-05	1	3.65356e-06	6	2.04859e-05	1	1.0928e-05	0.293958	0.402745	1.64825	1	0.879246	1	0.178345	0.126502	0.33433	0.43834	1.87462	1	hsa-let-7e*
hsa-miR-221*	0	0	1	3.65356e-06	6	2.04859e-05	1	1.0928e-05	-	-	-	-	-	-	0.178345	0.126502	0.33433	0.43834	1.87462	1	hsa-miR-221*
hsa-miR-377*	26	0.00032315	2	7.30711e-06	6	2.04859e-05	1	1.0928e-05	0.0226121	0	0.0633943	0	0.0338171	0	0.356691	0.291313	0.668659	1	1.87462	1	hsa-miR-377*
hsa-miR-543	1	1.24288e-05	2	7.30711e-06	6	2.04859e-05	1	1.0928e-05	0.587916	0.538429	1.64825	1	0.879246	1	0.356691	0.291313	0.668659	1	1.87462	1	hsa-miR-543
hsa-miR-127-5p	1	1.24288e-05	3	1.09607e-05	6	2.04859e-05	1	1.0928e-05	0.881873	1	1.64825	1	0.879246	1	0.535036	0.510061	1.00299	1	1.87462	1	hsa-miR-127-5p
hsa-miR-497*	0	0	3	1.09607e-05	6	2.04859e-05	1	1.0928e-05	-	-	-	-	-	-	0.535036	0.510061	1.00299	1	1.87462	1	hsa-miR-497*
hsa-miR-34b*	0	0	13	4.74962e-05	1	3.41431e-06	0	0	-	-	-	-	-	-	13.9109	0.000699	-	-	-	-	hsa-miR-34b*
hsa-miR-125b-2*	0	0	9	3.2882e-05	1	3.41431e-06	0	0	-	-	-	-	-	-	9.63064	0.009459	-	-	-	-	hsa-miR-125b-2*
hsa-miR-582-5p	0	0	13	4.74962e-05	4	1.36572e-05	0	0	-	-	-	-	-	-	3.47773	0.026818	-	-	-	-	hsa-miR-582-5p
hsa-miR-625	0	0	9	3.2882e-05	2	6.82862e-06	0	0	-	-	-	-	-	-	4.81532	0.033266	-	-	-	-	hsa-miR-625
hsa-miR-486-3p	0	0	2	7.30711e-06	10	3.41431e-05	0	0	-	-	-	-	-	-	0.214014	0.039867	-	-	-	-	hsa-miR-486-3p
hsa-miR-485-3p	5	6.21442e-05	0	0	5	1.70715e-05	0	0	0	0.000605	0.274709	0.044159	0	0.022418	0	0.063215	-	-	-	-	hsa-miR-485-3p
hsa-miR-380	0	0	0	0	5	1.70715e-05	0	0	-	-	-	-	-	-	0	0.063215	-	-	-	-	hsa-miR-380
hsa-miR-202	0	0	3	1.09607e-05	10	3.41431e-05	0	0	-	-	-	-	-	-	0.321021	0.094682	-	-	-	-	hsa-miR-202
hsa-miR-222*	0	0	0	0	4	1.36572e-05	0	0	-	-	-	-	-	-	0	0.125858	-	-	-	-	hsa-miR-222*
hsa-miR-324-3p	0	0	0	0	4	1.36572e-05	0	0	-	-	-	-	-	-	0	0.125858	-	-	-	-	hsa-miR-324-3p
hsa-miR-889	0	0	0	0	4	1.36572e-05	0	0	-	-	-	-	-	-	0	0.125858	-	-	-	-	hsa-miR-889
hsa-miR-887	5	6.21442e-05	1	3.65356e-06	6	2.04859e-05	0	0	0.0587916	0.002943	0.32965	0.066913	0	0.022418	0.178345	0.126502	-	-	-	-	hsa-miR-887
hsa-miR-1271	4	4.97154e-05	1	3.65356e-06	6	2.04859e-05	0	0	0.0734894	0.010897	0.412063	0.238026	0	0.047917	0.178345	0.126502	-	-	-	-	hsa-miR-1271
hsa-miR-188-3p	0	0	1	3.65356e-06	6	2.04859e-05	0	0	-	-	-	-	-	-	0.178345	0.126502	-	-	-	-	hsa-miR-188-3p
hsa-miR-296-5p	1	1.24288e-05	4	1.46142e-05	1	3.41431e-06	0	0	1.17583	1	0.274709	0.384571	0	0.467872	4.28029	0.203967	-	-	-	-	hsa-miR-296-5p
hsa-miR-873	1	1.24288e-05	1	3.65356e-06	5	1.70715e-05	0	0	0.293958	0.402745	1.37354	1	0	0.467872	0.214014	0.220358	-	-	-	-	hsa-miR-873
hsa-miR-409-5p	12	0.000149146	3	1.09607e-05	8	2.73145e-05	0	0	0.0734894	4e-06	0.183139	0.000217	0	0.00011	0.401277	0.229509	-	-	-	-	hsa-miR-409-5p
hsa-miR-503	3	3.72865e-05	6	2.19213e-05	12	4.09717e-05	0	0	0.587916	0.433924	1.09883	1	0	0.102417	0.535036	0.242734	-	-	-	-	hsa-miR-503
hsa-miR-26a-1*	0	0	0	0	3	1.02429e-05	0	0	-	-	-	-	-	-	0	0.250858	-	-	-	-	hsa-miR-26a-1*
hsa-miR-656	0	0	0	0	3	1.02429e-05	0	0	-	-	-	-	-	-	0	0.250858	-	-	-	-	hsa-miR-656
hsa-miR-372	0	0	0	0	3	1.02429e-05	0	0	-	-	-	-	-	-	0	0.250858	-	-	-	-	hsa-miR-372
hsa-miR-1	0	0	11	4.01891e-05	19	6.48719e-05	0	0	-	-	-	-	-	-	0.619515	0.272823	-	-	-	-	hsa-miR-1
hsa-miR-181d	2	2.48577e-05	2	7.30711e-06	6	2.04859e-05	0	0	0.293958	0.223851	0.824126	0.684734	0	0.218902	0.356691	0.291313	-	-	-	-	hsa-miR-181d
hsa-miR-1269	0	0	3	1.09607e-05	1	3.41431e-06	0	0	-	-	-	-	-	-	3.21021	0.358952	-	-	-	-	hsa-miR-1269
hsa-miR-15a*	0	0	7	2.55749e-05	4	1.36572e-05	0	0	-	-	-	-	-	-	1.87263	0.374161	-	-	-	-	hsa-miR-15a*
hsa-miR-23b*	4	4.97154e-05	1	3.65356e-06	4	1.36572e-05	0	0	0.0734894	0.010897	0.274709	0.071619	0	0.047917	0.267518	0.376429	-	-	-	-	hsa-miR-23b*
hsa-miR-376b	2	2.48577e-05	1	3.65356e-06	4	1.36572e-05	0	0	0.146979	0.131379	0.549417	0.615797	0	0.218902	0.267518	0.376429	-	-	-	-	hsa-miR-376b
hsa-miR-708*	0	0	1	3.65356e-06	4	1.36572e-05	0	0	-	-	-	-	-	-	0.267518	0.376429	-	-	-	-	hsa-miR-708*
hsa-miR-628-5p	0	0	1	3.65356e-06	4	1.36572e-05	0	0	-	-	-	-	-	-	0.267518	0.376429	-	-	-	-	hsa-miR-628-5p
hsa-miR-876-3p	0	0	1	3.65356e-06	4	1.36572e-05	0	0	-	-	-	-	-	-	0.267518	0.376429	-	-	-	-	hsa-miR-876-3p
hsa-miR-720	0	0	2	7.30711e-06	5	1.70715e-05	0	0	-	-	-	-	-	-	0.428029	0.455	-	-	-	-	hsa-miR-720
hsa-miR-370	12	0.000149146	0	0	2	6.82862e-06	0	0	0	0	0.0457848	1e-06	0	0.00011	0	0.500572	-	-	-	-	hsa-miR-370
hsa-miR-589	3	3.72865e-05	0	0	2	6.82862e-06	0	0	0	0.011724	0.183139	0.070522	0	0.102417	0	0.500572	-	-	-	-	hsa-miR-589
hsa-miR-376a	1	1.24288e-05	0	0	2	6.82862e-06	0	0	0	0.227177	0.549417	0.517201	0	0.467872	0	0.500572	-	-	-	-	hsa-miR-376a
hsa-miR-539	1	1.24288e-05	0	0	2	6.82862e-06	0	0	0	0.227177	0.549417	0.517201	0	0.467872	0	0.500572	-	-	-	-	hsa-miR-539
hsa-miR-877	0	0	0	0	2	6.82862e-06	0	0	-	-	-	-	-	-	0	0.500572	-	-	-	-	hsa-miR-877
hsa-miR-511	0	0	0	0	2	6.82862e-06	0	0	-	-	-	-	-	-	0	0.500572	-	-	-	-	hsa-miR-511
hsa-miR-129*	0	0	0	0	2	6.82862e-06	0	0	-	-	-	-	-	-	0	0.500572	-	-	-	-	hsa-miR-129*
hsa-miR-628-3p	0	0	0	0	2	6.82862e-06	0	0	-	-	-	-	-	-	0	0.500572	-	-	-	-	hsa-miR-628-3p
hsa-miR-1259	0	0	0	0	2	6.82862e-06	0	0	-	-	-	-	-	-	0	0.500572	-	-	-	-	hsa-miR-1259
hsa-miR-505*	0	0	0	0	2	6.82862e-06	0	0	-	-	-	-	-	-	0	0.500572	-	-	-	-	hsa-miR-505*
hsa-miR-512-3p	0	0	0	0	2	6.82862e-06	0	0	-	-	-	-	-	-	0	0.500572	-	-	-	-	hsa-miR-512-3p
hsa-miR-545*	0	0	0	0	2	6.82862e-06	0	0	-	-	-	-	-	-	0	0.500572	-	-	-	-	hsa-miR-545*
hsa-miR-330-5p	0	0	0	0	2	6.82862e-06	0	0	-	-	-	-	-	-	0	0.500572	-	-	-	-	hsa-miR-330-5p
hsa-miR-137	0	0	0	0	2	6.82862e-06	0	0	-	-	-	-	-	-	0	0.500572	-	-	-	-	hsa-miR-137
hsa-miR-1275	0	0	0	0	2	6.82862e-06	0	0	-	-	-	-	-	-	0	0.500572	-	-	-	-	hsa-miR-1275
hsa-miR-134	10	0.000124288	7	2.55749e-05	5	1.70715e-05	0	0	0.20577	0.001428	0.137354	0.000219	0	0.000503	1.4981	0.570466	-	-	-	-	hsa-miR-134
hsa-miR-92a-1*	1	1.24288e-05	2	7.30711e-06	1	3.41431e-06	0	0	0.587916	0.538429	0.274709	0.384571	0	0.467872	2.14014	0.61275	-	-	-	-	hsa-miR-92a-1*
hsa-miR-551a	1	1.24288e-05	2	7.30711e-06	1	3.41431e-06	0	0	0.587916	0.538429	0.274709	0.384571	0	0.467872	2.14014	0.61275	-	-	-	-	hsa-miR-551a
hsa-miR-411*	0	0	2	7.30711e-06	1	3.41431e-06	0	0	-	-	-	-	-	-	2.14014	0.61275	-	-	-	-	hsa-miR-411*
hsa-miR-34b	0	0	2	7.30711e-06	1	3.41431e-06	0	0	-	-	-	-	-	-	2.14014	0.61275	-	-	-	-	hsa-miR-34b
hsa-miR-768-3p	0	0	2	7.30711e-06	1	3.41431e-06	0	0	-	-	-	-	-	-	2.14014	0.61275	-	-	-	-	hsa-miR-768-3p
hsa-miR-1285	2	2.48577e-05	1	3.65356e-06	3	1.02429e-05	0	0	0.146979	0.131379	0.412063	0.29475	0	0.218902	0.356691	0.625858	-	-	-	-	hsa-miR-1285
hsa-miR-1247	0	0	1	3.65356e-06	3	1.02429e-05	0	0	-	-	-	-	-	-	0.356691	0.625858	-	-	-	-	hsa-miR-1247
hsa-miR-331-5p	0	0	1	3.65356e-06	3	1.02429e-05	0	0	-	-	-	-	-	-	0.356691	0.625858	-	-	-	-	hsa-miR-331-5p
hsa-miR-193b*	5	6.21442e-05	3	1.09607e-05	2	6.82862e-06	0	0	0.176375	0.018138	0.109883	0.006579	0	0.022418	1.60511	0.677661	-	-	-	-	hsa-miR-193b*
hsa-miR-195*	0	0	5	1.82678e-05	4	1.36572e-05	0	0	-	-	-	-	-	-	1.33759	0.746738	-	-	-	-	hsa-miR-195*
hsa-miR-200c*	0	0	8	2.92284e-05	7	2.39002e-05	0	0	-	-	-	-	-	-	1.22294	0.798592	-	-	-	-	hsa-miR-200c*
hsa-miR-378*	1	1.24288e-05	13	4.74962e-05	12	4.09717e-05	0	0	3.82145	0.214414	3.2965	0.322811	0	0.467872	1.15924	0.841959	-	-	-	-	hsa-miR-378*
hsa-miR-584	5	6.21442e-05	0	0	1	3.41431e-06	0	0	0	0.000605	0.0549417	0.002288	0	0.022418	0	1	-	-	-	-	hsa-miR-584
hsa-miR-490-5p	3	3.72865e-05	0	0	1	3.41431e-06	0	0	0	0.011724	0.0915695	0.033564	0	0.102417	0	1	-	-	-	-	hsa-miR-490-5p
hsa-miR-487b	2	2.48577e-05	0	0	1	3.41431e-06	0	0	0	0.051609	0.137354	0.119311	0	0.218902	0	1	-	-	-	-	hsa-miR-487b
hsa-miR-1228	2	2.48577e-05	0	0	1	3.41431e-06	0	0	0	0.051609	0.137354	0.119311	0	0.218902	0	1	-	-	-	-	hsa-miR-1228
hsa-miR-518e	0	0	0	0	1	3.41431e-06	0	0	-	-	-	-	-	-	0	1	-	-	-	-	hsa-miR-518e
hsa-miR-1306	0	0	0	0	1	3.41431e-06	0	0	-	-	-	-	-	-	0	1	-	-	-	-	hsa-miR-1306
hsa-miR-519b-3p	0	0	0	0	1	3.41431e-06	0	0	-	-	-	-	-	-	0	1	-	-	-	-	hsa-miR-519b-3p
hsa-miR-487a	0	0	0	0	1	3.41431e-06	0	0	-	-	-	-	-	-	0	1	-	-	-	-	hsa-miR-487a
hsa-miR-30c-1*	0	0	0	0	1	3.41431e-06	0	0	-	-	-	-	-	-	0	1	-	-	-	-	hsa-miR-30c-1*
hsa-miR-1826	0	0	0	0	1	3.41431e-06	0	0	-	-	-	-	-	-	0	1	-	-	-	-	hsa-miR-1826
hsa-miR-548n	0	0	0	0	1	3.41431e-06	0	0	-	-	-	-	-	-	0	1	-	-	-	-	hsa-miR-548n
hsa-miR-1280	0	0	0	0	1	3.41431e-06	0	0	-	-	-	-	-	-	0	1	-	-	-	-	hsa-miR-1280
hsa-miR-876-5p	0	0	0	0	1	3.41431e-06	0	0	-	-	-	-	-	-	0	1	-	-	-	-	hsa-miR-876-5p
hsa-miR-374a*	0	0	0	0	1	3.41431e-06	0	0	-	-	-	-	-	-	0	1	-	-	-	-	hsa-miR-374a*
hsa-miR-491-5p	0	0	0	0	1	3.41431e-06	0	0	-	-	-	-	-	-	0	1	-	-	-	-	hsa-miR-491-5p
hsa-miR-1286	0	0	0	0	1	3.41431e-06	0	0	-	-	-	-	-	-	0	1	-	-	-	-	hsa-miR-1286
hsa-miR-579	0	0	0	0	1	3.41431e-06	0	0	-	-	-	-	-	-	0	1	-	-	-	-	hsa-miR-579
hsa-miR-671-3p	0	0	0	0	1	3.41431e-06	0	0	-	-	-	-	-	-	0	1	-	-	-	-	hsa-miR-671-3p
hsa-miR-450b-3p	0	0	0	0	1	3.41431e-06	0	0	-	-	-	-	-	-	0	1	-	-	-	-	hsa-miR-450b-3p
hsa-miR-519d	0	0	0	0	1	3.41431e-06	0	0	-	-	-	-	-	-	0	1	-	-	-	-	hsa-miR-519d
hsa-miR-1292	0	0	0	0	1	3.41431e-06	0	0	-	-	-	-	-	-	0	1	-	-	-	-	hsa-miR-1292
hsa-miR-1255a	0	0	0	0	1	3.41431e-06	0	0	-	-	-	-	-	-	0	1	-	-	-	-	hsa-miR-1255a
hsa-miR-488*	0	0	0	0	1	3.41431e-06	0	0	-	-	-	-	-	-	0	1	-	-	-	-	hsa-miR-488*
hsa-miR-556-3p	0	0	0	0	1	3.41431e-06	0	0	-	-	-	-	-	-	0	1	-	-	-	-	hsa-miR-556-3p
hsa-miR-326	0	0	0	0	1	3.41431e-06	0	0	-	-	-	-	-	-	0	1	-	-	-	-	hsa-miR-326
hsa-miR-431	10	0.000124288	1	3.65356e-06	2	6.82862e-06	0	0	0.0293958	3e-06	0.0549417	9e-06	0	0.000503	0.535036	1	-	-	-	-	hsa-miR-431
hsa-let-7f-1*	1	1.24288e-05	1	3.65356e-06	2	6.82862e-06	0	0	0.293958	0.402745	0.549417	0.517201	0	0.467872	0.535036	1	-	-	-	-	hsa-let-7f-1*
hsa-miR-500*	1	1.24288e-05	1	3.65356e-06	2	6.82862e-06	0	0	0.293958	0.402745	0.549417	0.517201	0	0.467872	0.535036	1	-	-	-	-	hsa-miR-500*
hsa-miR-675	0	0	1	3.65356e-06	2	6.82862e-06	0	0	-	-	-	-	-	-	0.535036	1	-	-	-	-	hsa-miR-675
hsa-miR-33a	0	0	1	3.65356e-06	2	6.82862e-06	0	0	-	-	-	-	-	-	0.535036	1	-	-	-	-	hsa-miR-33a
hsa-miR-323-3p	10	0.000124288	3	1.09607e-05	4	1.36572e-05	0	0	0.0881873	5.2e-05	0.109883	9.1e-05	0	0.000503	0.802554	1	-	-	-	-	hsa-miR-323-3p
hsa-miR-143*	0	0	3	1.09607e-05	4	1.36572e-05	0	0	-	-	-	-	-	-	0.802554	1	-	-	-	-	hsa-miR-143*
hsa-miR-377	2	2.48577e-05	3	1.09607e-05	3	1.02429e-05	0	0	0.440937	0.319137	0.412063	0.29475	0	0.218902	1.07007	1	-	-	-	-	hsa-miR-377
hsa-miR-768-5p	0	0	3	1.09607e-05	3	1.02429e-05	0	0	-	-	-	-	-	-	1.07007	1	-	-	-	-	hsa-miR-768-5p
hsa-miR-886-5p	16	0.000198862	1	3.65356e-06	1	3.41431e-06	0	0	0.0183724	0	0.0171693	0	0	5e-06	1.07007	1	-	-	-	-	hsa-miR-886-5p
hsa-miR-125b-1*	13	0.000161575	1	3.65356e-06	1	3.41431e-06	0	0	0.0226121	0	0.0211314	0	0	5.1e-05	1.07007	1	-	-	-	-	hsa-miR-125b-1*
hsa-miR-101*	1	1.24288e-05	8	2.92284e-05	8	2.73145e-05	0	0	2.35166	0.694088	2.19767	0.694259	0	0.467872	1.07007	1	-	-	-	-	hsa-miR-101*
hsa-miR-519a	0	0	9	3.2882e-05	9	3.07288e-05	0	0	-	-	-	-	-	-	1.07007	1	-	-	-	-	hsa-miR-519a
hsa-miR-507	0	0	2	7.30711e-06	2	6.82862e-06	0	0	-	-	-	-	-	-	1.07007	1	-	-	-	-	hsa-miR-507
hsa-miR-425*	0	0	2	7.30711e-06	2	6.82862e-06	0	0	-	-	-	-	-	-	1.07007	1	-	-	-	-	hsa-miR-425*
hsa-miR-320c	0	0	1	3.65356e-06	1	3.41431e-06	0	0	-	-	-	-	-	-	1.07007	1	-	-	-	-	hsa-miR-320c
hsa-miR-489	0	0	1	3.65356e-06	1	3.41431e-06	0	0	-	-	-	-	-	-	1.07007	1	-	-	-	-	hsa-miR-489
hsa-miR-548o	0	0	1	3.65356e-06	1	3.41431e-06	0	0	-	-	-	-	-	-	1.07007	1	-	-	-	-	hsa-miR-548o
hsa-miR-616*	0	0	1	3.65356e-06	1	3.41431e-06	0	0	-	-	-	-	-	-	1.07007	1	-	-	-	-	hsa-miR-616*
hsa-miR-518b	0	0	1	3.65356e-06	1	3.41431e-06	0	0	-	-	-	-	-	-	1.07007	1	-	-	-	-	hsa-miR-518b
hsa-miR-744*	0	0	1	3.65356e-06	1	3.41431e-06	0	0	-	-	-	-	-	-	1.07007	1	-	-	-	-	hsa-miR-744*
hsa-miR-18a*	0	0	1	3.65356e-06	1	3.41431e-06	0	0	-	-	-	-	-	-	1.07007	1	-	-	-	-	hsa-miR-18a*
hsa-miR-135b*	0	0	1	3.65356e-06	1	3.41431e-06	0	0	-	-	-	-	-	-	1.07007	1	-	-	-	-	hsa-miR-135b*
hsa-miR-1185	9	0.00011186	3	1.09607e-05	0	0	0	0	0.0979859	0.000179	0	1e-06	0	0.001074	-	-	-	-	-	-	hsa-miR-1185
hsa-miR-122	7	8.70019e-05	0	0	0	0	0	0	0	3.1e-05	0	2.2e-05	0	0.004907	-	-	-	-	-	-	hsa-miR-122
hsa-miR-329	4	4.97154e-05	1	3.65356e-06	0	0	0	0	0.0734894	0.010897	0	0.002157	0	0.047917	-	-	-	-	-	-	hsa-miR-329
hsa-miR-766	3	3.72865e-05	0	0	0	0	0	0	0	0.011724	0	0.010009	0	0.102417	-	-	-	-	-	-	hsa-miR-766
hsa-miR-654-5p	3	3.72865e-05	0	0	0	0	0	0	0	0.011724	0	0.010009	0	0.102417	-	-	-	-	-	-	hsa-miR-654-5p
hsa-miR-585	2	2.48577e-05	2	7.30711e-06	0	0	0	0	0.293958	0.223851	0	0.046443	0	0.218902	-	-	-	-	-	-	hsa-miR-585
hsa-miR-30d*	2	2.48577e-05	2	7.30711e-06	0	0	0	0	0.293958	0.223851	0	0.046443	0	0.218902	-	-	-	-	-	-	hsa-miR-30d*
hsa-miR-452	2	2.48577e-05	1	3.65356e-06	0	0	0	0	0.146979	0.131379	0	0.046443	0	0.218902	-	-	-	-	-	-	hsa-miR-452
hsa-miR-490-3p	2	2.48577e-05	0	0	0	0	0	0	0	0.051609	0	0.046443	0	0.218902	-	-	-	-	-	-	hsa-miR-490-3p
hsa-miR-25*	2	2.48577e-05	0	0	0	0	0	0	0	0.051609	0	0.046443	0	0.218902	-	-	-	-	-	-	hsa-miR-25*
hsa-miR-769-3p	2	2.48577e-05	0	0	0	0	0	0	0	0.051609	0	0.046443	0	0.218902	-	-	-	-	-	-	hsa-miR-769-3p
hsa-miR-1260	2	2.48577e-05	0	0	0	0	0	0	0	0.051609	0	0.046443	0	0.218902	-	-	-	-	-	-	hsa-miR-1260
hsa-miR-1908	2	2.48577e-05	0	0	0	0	0	0	0	0.051609	0	0.046443	0	0.218902	-	-	-	-	-	-	hsa-miR-1908
hsa-miR-296-3p	1	1.24288e-05	4	1.46142e-05	0	0	0	0	1.17583	1	0	0.215507	0	0.467872	-	-	-	-	-	-	hsa-miR-296-3p
hsa-miR-483-3p	1	1.24288e-05	2	7.30711e-06	0	0	0	0	0.587916	0.538429	0	0.215507	0	0.467872	-	-	-	-	-	-	hsa-miR-483-3p
hsa-miR-548d-5p	1	1.24288e-05	2	7.30711e-06	0	0	0	0	0.587916	0.538429	0	0.215507	0	0.467872	-	-	-	-	-	-	hsa-miR-548d-5p
hsa-miR-431*	1	1.24288e-05	0	0	0	0	0	0	0	0.227177	0	0.215507	0	0.467872	-	-	-	-	-	-	hsa-miR-431*
hsa-miR-615-5p	1	1.24288e-05	0	0	0	0	0	0	0	0.227177	0	0.215507	0	0.467872	-	-	-	-	-	-	hsa-miR-615-5p
hsa-miR-549	1	1.24288e-05	0	0	0	0	0	0	0	0.227177	0	0.215507	0	0.467872	-	-	-	-	-	-	hsa-miR-549
hsa-miR-589*	1	1.24288e-05	0	0	0	0	0	0	0	0.227177	0	0.215507	0	0.467872	-	-	-	-	-	-	hsa-miR-589*
hsa-miR-1294	1	1.24288e-05	0	0	0	0	0	0	0	0.227177	0	0.215507	0	0.467872	-	-	-	-	-	-	hsa-miR-1294
hsa-miR-1249	1	1.24288e-05	0	0	0	0	0	0	0	0.227177	0	0.215507	0	0.467872	-	-	-	-	-	-	hsa-miR-1249
hsa-miR-129-3p	1	1.24288e-05	0	0	0	0	0	0	0	0.227177	0	0.215507	0	0.467872	-	-	-	-	-	-	hsa-miR-129-3p
hsa-miR-1255b	1	1.24288e-05	0	0	0	0	0	0	0	0.227177	0	0.215507	0	0.467872	-	-	-	-	-	-	hsa-miR-1255b
hsa-miR-19a*	0	0	3	1.09607e-05	0	0	0	0	-	-	-	-	-	-	-	-	-	-	-	-	hsa-miR-19a*
hsa-miR-338-5p	0	0	3	1.09607e-05	0	0	0	0	-	-	-	-	-	-	-	-	-	-	-	-	hsa-miR-338-5p
hsa-miR-1299	0	0	3	1.09607e-05	0	0	0	0	-	-	-	-	-	-	-	-	-	-	-	-	hsa-miR-1299
hsa-miR-7-2*	0	0	3	1.09607e-05	0	0	0	0	-	-	-	-	-	-	-	-	-	-	-	-	hsa-miR-7-2*
hsa-miR-212	0	0	2	7.30711e-06	0	0	0	0	-	-	-	-	-	-	-	-	-	-	-	-	hsa-miR-212
hsa-miR-607	0	0	2	7.30711e-06	0	0	0	0	-	-	-	-	-	-	-	-	-	-	-	-	hsa-miR-607
hsa-miR-383	0	0	2	7.30711e-06	0	0	0	0	-	-	-	-	-	-	-	-	-	-	-	-	hsa-miR-383
hsa-miR-187*	0	0	2	7.30711e-06	0	0	0	0	-	-	-	-	-	-	-	-	-	-	-	-	hsa-miR-187*
hsa-miR-1251	0	0	2	7.30711e-06	0	0	0	0	-	-	-	-	-	-	-	-	-	-	-	-	hsa-miR-1251
hsa-miR-194*	0	0	1	3.65356e-06	0	0	0	0	-	-	-	-	-	-	-	-	-	-	-	-	hsa-miR-194*
hsa-miR-642	0	0	1	3.65356e-06	0	0	0	0	-	-	-	-	-	-	-	-	-	-	-	-	hsa-miR-642
hsa-let-7g*	0	0	1	3.65356e-06	0	0	0	0	-	-	-	-	-	-	-	-	-	-	-	-	hsa-let-7g*
hsa-miR-24-1*	0	0	1	3.65356e-06	0	0	0	0	-	-	-	-	-	-	-	-	-	-	-	-	hsa-miR-24-1*
hsa-miR-651	0	0	1	3.65356e-06	0	0	0	0	-	-	-	-	-	-	-	-	-	-	-	-	hsa-miR-651
hsa-miR-218-2*	0	0	1	3.65356e-06	0	0	0	0	-	-	-	-	-	-	-	-	-	-	-	-	hsa-miR-218-2*
hsa-miR-582-3p	0	0	1	3.65356e-06	0	0	0	0	-	-	-	-	-	-	-	-	-	-	-	-	hsa-miR-582-3p
hsa-miR-320d	0	0	1	3.65356e-06	0	0	0	0	-	-	-	-	-	-	-	-	-	-	-	-	hsa-miR-320d
hsa-miR-570	0	0	1	3.65356e-06	0	0	0	0	-	-	-	-	-	-	-	-	-	-	-	-	hsa-miR-570
hsa-miR-636	0	0	1	3.65356e-06	0	0	0	0	-	-	-	-	-	-	-	-	-	-	-	-	hsa-miR-636
hsa-miR-192*	0	0	1	3.65356e-06	0	0	0	0	-	-	-	-	-	-	-	-	-	-	-	-	hsa-miR-192*
hsa-miR-1229	0	0	1	3.65356e-06	0	0	0	0	-	-	-	-	-	-	-	-	-	-	-	-	hsa-miR-1229
hsa-miR-625*	0	0	1	3.65356e-06	0	0	0	0	-	-	-	-	-	-	-	-	-	-	-	-	hsa-miR-625*
hsa-miR-597	0	0	1	3.65356e-06	0	0	0	0	-	-	-	-	-	-	-	-	-	-	-	-	hsa-miR-597
hsa-miR-302b	0	0	1	3.65356e-06	0	0	0	0	-	-	-	-	-	-	-	-	-	-	-	-	hsa-miR-302b
hsa-miR-501-3p	0	0	1	3.65356e-06	0	0	0	0	-	-	-	-	-	-	-	-	-	-	-	-	hsa-miR-501-3p
hsa-miR-1197	0	0	1	3.65356e-06	0	0	0	0	-	-	-	-	-	-	-	-	-	-	-	-	hsa-miR-1197
hsa-miR-551b	0	0	1	3.65356e-06	0	0	0	0	-	-	-	-	-	-	-	-	-	-	-	-	hsa-miR-551b
