# Supplementary material for: Repertoire of microRNAs in Epithelial Ovarian Cancer as Determined by Next Generation Sequencing of Small RNA cDNA Libraries
Source: PLoS One. 2009 Apr 23;4(4):e5311. doi: 10.1371/journal.pone.0005311 (PMC2668797; doi:10.1371/journal.pone.0005311)
Supplement: Table S3 — MicroRNAs differentially expressed between ovarian cancer and normal HOSE. (0.05 MB XLS) [file pone.0005311.s003.xls]

## Sheet: most_diff.txt
Supplementary Table S3: MicroRNAs differentially expressed between ovarian cancer and normal HOSE.
Over-expressed ≥4-fold with respect to HOSE, P-value < 5.0E-6
miRNA	HOSE reads	HOSE frac	OSC reads	OSC frac	OSC vs HOSE	fisher P-value	OCC reads	OCC frac	OCC vs HOSE	fisher P-value	OEC reads	OEC frac	OEC vs HOSE	fisher P-value
hsa-let-7c	407	0.00505854	10627	0.0388263	7.6754	<0.000001	9453	0.0322755	6.38039	<0.000001	1765	0.0192879	3.81294	<0.000001
hsa-let-7g	262	0.00325636	3794	0.0138616	4.25678	<0.000001	3530	0.0120525	3.70123	<0.000001	1158	0.0126546	3.88613	<0.000001
hsa-miR-106b	105	0.00130503	1665	0.00608317	4.66133	<0.000001	1129	0.00385476	2.95377	<0.000001	494	0.00539844	4.13664	<0.000001
hsa-miR-10b	20	0.000248577	541	0.00197657	7.95156	<0.000001	1048	0.0035782	14.3947	<0.000001	394	0.00430563	17.3211	<0.000001
hsa-miR-126	11	0.000136717	539	0.00196927	14.4039	<0.000001	670	0.00228759	16.7322	<0.000001	213	0.00232767	17.0254	<0.000001
hsa-miR-126*	3	3.72865e-05	232	0.000847625	22.7327	<0.000001	351	0.00119842	32.1409	<0.000001	98	0.00107094	28.722	<0.000001
hsa-miR-135b	6	7.45731e-05	860	0.00314206	42.1339	<0.000001	497	0.00169691	22.755	<0.000001	492	0.00537658	72.0981	<0.000001
hsa-miR-141	0	0	1411	0.00515517	NA	<0.000001	908	0.00310019	NA	<0.000001	411	0.00449141	NA	<0.000001
hsa-miR-142-3p	5	6.21442e-05	4760	0.0173909	279.848	<0.000001	3722	0.0127081	204.493	<0.000001	902	0.00985706	158.616	<0.000001
hsa-miR-142-5p	0	0	214	0.000781861	NA	<0.000001	236	0.000805777	NA	<0.000001	64	0.000699392	NA	<0.000001
hsa-miR-143	71	0.000882448	2956	0.0107999	12.2386	<0.000001	4006	0.0136777	15.4998	<0.000001	616	0.00673165	7.62838	<0.000001
hsa-miR-145	38	0.000472296	566	0.00206791	4.37842	<0.000001	1255	0.00428496	9.07261	<0.000001	156	0.00170477	3.60953	<0.000001
hsa-miR-15a	20	0.000248577	594	0.00217021	8.73055	<0.000001	556	0.00189836	7.6369	<0.000001	135	0.00147528	5.93491	<0.000001
hsa-miR-16	172	0.00213776	6868	0.0250926	11.7378	<0.000001	2622	0.00895232	4.18771	<0.000001	1211	0.0132338	6.1905	<0.000001
hsa-miR-18a	19	0.000236148	452	0.00165141	6.9931	<0.000001	320	0.00109258	4.62667	<0.000001	140	0.00152992	6.47865	<0.000001
hsa-miR-192	3	3.72865e-05	101	0.000369009	9.89658	<0.000001	151	0.000515561	13.827	<0.000001	38	0.000415264	11.1371	<0.000001
hsa-miR-195	6	7.45731e-05	985	0.00359875	48.2581	<0.000001	1373	0.00468785	62.8625	<0.000001	286	0.00312541	41.9107	<0.000001
hsa-miR-196b	53	0.000658729	67	0.000244788	0.371607	<0.000001	25	8.53577e-05	0.129579	<0.000001	249	0.00272107	4.1308	<0.000001
hsa-miR-199a-5p	166	0.00206319	1293	0.00472405	2.28968	<0.000001	4622	0.0157809	7.64881	<0.000001	364	0.00397779	1.92798	<0.000001
hsa-miR-199b-3p	64	0.000795446	1901	0.00694541	8.73146	<0.000001	3023	0.0103215	12.9757	<0.000001	480	0.00524544	6.59434	<0.000001
hsa-miR-199b-5p	3	3.72865e-05	154	0.000562648	15.0898	<0.000001	250	0.000853577	22.8924	<0.000001	51	0.000557328	14.9472	<0.000001
hsa-miR-19a	29	0.000360437	574	0.00209714	5.81834	<0.000001	281	0.000959421	2.66183	<0.000001	121	0.00132229	3.66858	<0.000001
hsa-miR-19b	182	0.00226205	2684	0.00980614	4.33507	<0.000001	1072	0.00366014	1.61806	<0.000001	661	0.00722341	3.1933	<0.000001
hsa-miR-200a	12	0.000149146	853	0.00311648	20.8955	<0.000001	907	0.00309678	20.7634	<0.000001	655	0.00715784	47.9922	<0.000001
hsa-miR-200b	23	0.000285863	3290	0.0120202	42.0487	<0.000001	2852	0.00973761	34.0639	<0.000001	2428	0.0265332	92.8177	<0.000001
hsa-miR-200c	23	0.000285863	15314	0.0559505	195.725	<0.000001	9001	0.0307322	107.507	<0.000001	5077	0.0554815	194.084	<0.000001
hsa-miR-202*	0	0	138	0.000504191	NA	<0.000001	452	0.00154327	NA	<0.000001	105	0.00114744	NA	<0.000001
hsa-miR-203	0	0	136	0.000496884	NA	<0.000001	146	0.000498489	NA	<0.000001	90	0.000983521	NA	<0.000001
hsa-miR-20a	40	0.000497154	2009	0.00733999	14.764	<0.000001	996	0.00340065	6.84024	<0.000001	400	0.0043712	8.79246	<0.000001
hsa-miR-223	0	0	330	0.00120567	NA	<0.000001	1362	0.00465029	NA	<0.000001	456	0.00498317	NA	<0.000001
hsa-miR-26a	126	0.00156603	3990	0.0145777	9.30866	<0.000001	2992	0.0102156	6.52324	<0.000001	932	0.0101849	6.50363	<0.000001
hsa-miR-26b	12	0.000149146	842	0.00307629	20.626	<0.000001	790	0.0026973	18.085	<0.000001	278	0.00303799	20.3692	<0.000001
hsa-miR-29a	145	0.00180218	2296	0.00838856	4.65467	<0.000001	1366	0.00466395	2.58794	<0.000001	540	0.00590112	3.27443	<0.000001
hsa-miR-29c	21	0.000261006	718	0.00262325	10.0506	<0.000001	562	0.00191884	7.35172	<0.000001	119	0.00130043	4.98239	<0.000001
hsa-miR-30a	63	0.000783017	797	0.00291188	3.7188	<0.000001	3527	0.0120423	15.3793	<0.000001	238	0.00260087	3.32159	<0.000001
hsa-miR-30b	57	0.000708444	2399	0.00876488	12.372	<0.000001	2628	0.00897281	12.6655	<0.000001	752	0.00821786	11.5999	<0.000001
hsa-miR-30c	57	0.000708444	2033	0.00742768	10.4845	<0.000001	4084	0.013944	19.6826	<0.000001	520	0.00568256	8.02119	<0.000001
hsa-miR-30d	100	0.00124288	1768	0.00645949	5.19717	<0.000001	1626	0.00555167	4.46676	<0.000001	562	0.00614154	4.94136	<0.000001
hsa-miR-30e	14	0.000174004	576	0.00210445	12.0943	<0.000001	312	0.00106526	6.12208	<0.000001	92	0.00100538	5.7779	<0.000001
hsa-miR-335	13	0.000161575	548	0.00200215	12.3914	<0.000001	434	0.00148181	9.17104	<0.000001	154	0.00168291	10.4157	<0.000001
hsa-miR-429	0	0	112	0.000409198	NA	<0.000001	136	0.000464346	NA	<0.000001	81	0.000885169	NA	<0.000001
hsa-miR-451	0	0	318	0.00116183	NA	<0.000001	688	0.00234904	NA	<0.000001	38	0.000415264	NA	<0.000001
hsa-miR-508-3p	0	0	66	0.000241135	NA	<0.000001	143	0.000488246	NA	<0.000001	57	0.000622896	NA	<0.000001
hsa-miR-92a	16	0.000198862	378	0.00138104	6.94475	<0.000001	378	0.00129061	6.48999	<0.000001	123	0.00134414	6.7592	<0.000001
hsa-miR-99a	5	6.21442e-05	343	0.00125317	20.1655	<0.000001	254	0.000867235	13.9552	<0.000001	37	0.000404336	6.50642	3e-06
hsa-miR-214	11	0.000136717	159	0.000580915	4.24903	<0.000001	474	0.00161838	11.8374	<0.000001	49	0.000535472	3.91664	6e-06
hsa-miR-146b-5p	32	0.000397723	670	0.00244788	6.15474	<0.000001	338	0.00115404	2.90161	<0.000001	74	0.000808672	2.03326	0.000602
hsa-miR-497	3	3.72865e-05	101	0.000369009	9.89658	<0.000001	122	0.000416546	11.1715	<0.000001	10	0.00010928	2.93082	0.100928
hsa-miR-150	0	0	62	0.00022652	NA	<0.000001	55	0.000187787	NA	3e-06	3	3.2784e-05	NA	0.253092
hsa-miR-107	3	3.72865e-05	121	0.00044208	11.8563	<0.000001	79	0.00026973	7.23399	1e-05	50	0.0005464	14.6541	<0.000001
hsa-miR-182	1	1.24288e-05	121	0.00044208	35.5689	<0.000001	45	0.000153644	12.3619	0.000425	222	0.00242602	195.193	<0.000001
hsa-miR-20b	0	0	108	0.000394584	NA	<0.000001	28	9.56007e-05	NA	0.001947	76	0.000830528	NA	<0.000001
hsa-miR-141*	0	0	59	0.00021556	NA	<0.000001	22	7.51148e-05	NA	0.007789	10	0.00010928	NA	0.002322
hsa-miR-135a	0	0	230	0.000840318	NA	<0.000001	14	4.78003e-05	NA	0.050927	104	0.00113651	NA	<0.000001
hsa-miR-205	0	0	262	0.000957231	NA	<0.000001	5	1.70715e-05	NA	0.591878	210	0.00229488	NA	<0.000001
hsa-miR-449a	0	0	1032	0.00377047	NA	<0.000001	2	6.82862e-06	NA	1	109	0.00119115	NA	<0.000001
hsa-miR-509-3p	0	0	53	0.000193638	NA	2e-06	154	0.000525804	NA	<0.000001	51	0.000557328	NA	<0.000001
hsa-miR-144	0	0	52	0.000189985	NA	3e-06	306	0.00104478	NA	<0.000001	20	0.00021856	NA	4e-06
hsa-miR-32	2	2.48577e-05	68	0.000248442	9.99456	5e-06	105	0.000358502	14.4222	<0.000001	21	0.000229488	9.23208	0.000185
hsa-miR-106a	0	0	42	0.000153449	NA	2.7e-05	3	1.02429e-05	NA	1	27	0.000295056	NA	<0.000001
hsa-miR-194	4	4.97154e-05	67	0.000244788	4.92379	0.000174	93	0.000317531	6.38697	3e-06	23	0.000251344	5.05566	0.000744
hsa-miR-9	0	0	32	0.000116914	NA	0.000439	31	0.000105844	NA	0.000762	42	0.000458976	NA	<0.000001
hsa-miR-183	0	0	30	0.000109607	NA	0.000698	21	7.17005e-05	NA	0.013247	51	0.000557328	NA	<0.000001
hsa-miR-513a-5p	0	0	29	0.000105953	NA	0.001186	50	0.000170715	NA	8e-06	22	0.000240416	NA	<0.000001
hsa-miR-513b	0	0	26	9.49924e-05	NA	0.001782	68	0.000232173	NA	<0.000001	27	0.000295056	NA	<0.000001
hsa-miR-513c	0	0	24	8.76853e-05	NA	0.002868	96	0.000327774	NA	<0.000001	37	0.000404336	NA	<0.000001
hsa-miR-96	0	0	21	7.67247e-05	NA	0.00737	16	5.46289e-05	NA	0.031734	39	0.000426192	NA	<0.000001
hsa-miR-486-5p	0	0	19	6.94176e-05	NA	0.011782	143	0.000488246	NA	<0.000001	5	5.464e-05	NA	0.065082
hsa-miR-18b	0	0	17	6.21104e-05	NA	0.018924	2	6.82862e-06	NA	1	23	0.000251344	NA	<0.000001
hsa-miR-885-5p	0	0	14	5.11498e-05	NA	0.050326	56	0.000191201	NA	2e-06	7	7.6496e-05	NA	0.016987
hsa-miR-499-5p	0	0	10	3.65356e-05	NA	0.130259	5	1.70715e-05	NA	0.591878	74	0.000808672	NA	<0.000001
hsa-miR-660	12	0.000149146	58	0.000211906	1.4208	0.318492	183	0.000624819	4.1893	<0.000001	36	0.000393408	2.63774	0.002256
hsa-miR-196a	6	7.45731e-05	20	7.30711e-05	0.979859	1	10	3.41431e-05	0.457848	0.13035	79	0.000863312	11.5767	<0.000001
Under-expressed ≥4-fold with respect to HOSE, P-value < 5.0E-6
miRNA	HOSE reads	HOSE frac	OSC reads	OSC frac	OSC vs HOSE	fisher P-value	OCC reads	OCC frac	OCC vs HOSE	fisher P-value	OEC reads	OEC frac	OEC vs HOSE	fisher P-value
hsa-miR-125b	7055	0.0876855	5822	0.021271	0.242583	<0.000001	11457	0.0391177	0.446114	<0.000001	2225	0.0243148	0.277296	<0.000001
hsa-miR-221	1859	0.0231052	907	0.00331377	0.143421	<0.000001	787	0.00268706	0.116297	<0.000001	226	0.00246973	0.106891	<0.000001
hsa-miR-31	1703	0.0211663	191	0.000697829	0.0329688	<0.000001	337	0.00115062	0.054361	<0.000001	136	0.00148621	0.0702157	<0.000001
hsa-miR-31*	744	0.00924706	170	0.000621104	0.0671678	<0.000001	218	0.000744319	0.0804925	<0.000001	109	0.00119115	0.128814	<0.000001
hsa-miR-210	697	0.0086629	77	0.000281324	0.0324745	<0.000001	140	0.000478003	0.0551782	<0.000001	46	0.000502688	0.0580277	<0.000001
hsa-miR-222	483	0.00600313	590	0.0021556	0.359079	<0.000001	498	0.00170033	0.28324	<0.000001	92	0.00100538	0.167475	<0.000001
hsa-miR-193a-3p	254	0.00315693	284	0.00103761	0.328677	<0.000001	212	0.000723834	0.229284	<0.000001	47	0.000513616	0.162695	<0.000001
hsa-miR-100	226	0.00280892	118	0.00043112	0.153482	<0.000001	45	0.000153644	0.0546986	<0.000001	18	0.000196704	0.0700284	<0.000001
hsa-miR-152	194	0.0024112	87	0.000317859	0.131826	<0.000001	157	0.000536047	0.222316	<0.000001	22	0.000240416	0.0997083	<0.000001
hsa-miR-574-5p	181	0.00224962	68	0.000248442	0.110437	<0.000001	110	0.000375574	0.16695	<0.000001	26	0.000284128	0.1263	<0.000001
hsa-miR-22	160	0.00198862	47	0.000171717	0.0863501	<0.000001	54	0.000184373	0.0927141	<0.000001	14	0.000152992	0.076934	<0.000001
hsa-miR-136	144	0.00178975	103	0.000376316	0.210261	<0.000001	224	0.000764805	0.427324	<0.000001	70	0.00076496	0.427411	<0.000001
hsa-miR-409-3p	142	0.0017649	12	4.38427e-05	0.0248415	<0.000001	25	8.53577e-05	0.0483642	<0.000001	8	8.74241e-05	0.049535	<0.000001
hsa-miR-146a	137	0.00170275	82	0.000299592	0.175946	<0.000001	61	0.000208273	0.122315	<0.000001	50	0.0005464	0.320893	<0.000001
hsa-miR-185	134	0.00166547	52	0.000189985	0.114073	<0.000001	168	0.000573604	0.344411	<0.000001	16	0.000174848	0.104985	<0.000001
hsa-miR-193a-5p	131	0.00162818	20	7.30711e-05	0.044879	<0.000001	43	0.000146815	0.0901715	<0.000001	8	8.74241e-05	0.0536944	<0.000001
hsa-miR-379	103	0.00128017	39	0.000142489	0.111304	<0.000001	41	0.000139987	0.10935	<0.000001	12	0.000131136	0.102436	<0.000001
hsa-miR-320a	103	0.00128017	52	0.000189985	0.148406	<0.000001	59	0.000201444	0.157357	<0.000001	26	0.000284128	0.221945	<0.000001
hsa-miR-21*	98	0.00121803	60	0.000219213	0.179974	<0.000001	76	0.000259488	0.213039	<0.000001	13	0.000142064	0.116635	<0.000001
hsa-miR-382	96	0.00119317	12	4.38427e-05	0.0367447	<0.000001	45	0.000153644	0.12877	<0.000001	4	4.3712e-05	0.0366352	<0.000001
hsa-miR-130b	87	0.00108131	56	0.000204599	0.189214	<0.000001	49	0.000167301	0.154721	<0.000001	13	0.000142064	0.131382	<0.000001
hsa-miR-493	79	0.000981879	4	1.46142e-05	0.0148839	<0.000001	12	4.09717e-05	0.0417279	<0.000001	4	4.3712e-05	0.0445188	<0.000001
hsa-miR-1308	73	0.000907306	50	0.000182678	0.201341	<0.000001	17	5.80433e-05	0.0639732	<0.000001	17	0.000185776	0.204756	<0.000001
hsa-miR-127-3p	65	0.000807875	10	3.65356e-05	0.0452243	<0.000001	37	0.000126329	0.156373	<0.000001	2	2.1856e-05	0.0270537	<0.000001
hsa-miR-744	61	0.00075816	11	4.01891e-05	0.0530088	<0.000001	42	0.000143401	0.189144	<0.000001	8	8.74241e-05	0.115311	<0.000001
hsa-miR-196b	53	0.000658729	67	0.000244788	0.371607	<0.000001	25	8.53577e-05	0.129579	<0.000001	249	0.00272107	4.1308	<0.000001
hsa-miR-377*	26	0.00032315	2	7.30711e-06	0.0226121	<0.000001	6	2.04859e-05	0.0633943	<0.000001	1	1.0928e-05	0.0338171	<0.000001
hsa-miR-423-5p	39	0.000484725	29	0.000105953	0.218584	<0.000001	43	0.000146815	0.302884	<0.000001	9	9.83521e-05	0.202903	<0.000001
hsa-miR-886-5p	16	0.000198862	1	3.65356e-06	0.0183724	<0.000001	1	3.41431e-06	0.0171693	<0.000001	0	0	NA	5e-06
hsa-miR-125b-1*	13	0.000161575	1	3.65356e-06	0.0226121	<0.000001	1	3.41431e-06	0.0211314	<0.000001	0	0	NA	5.1e-05
hsa-miR-181a*	34	0.000422581	19	6.94176e-05	0.164271	<0.000001	18	6.14576e-05	0.145434	<0.000001	10	0.00010928	0.258602	5.3e-05
hsa-miR-181a	90	0.0011186	66	0.000241135	0.215569	<0.000001	73	0.000249245	0.222819	<0.000001	53	0.000579184	0.517778	0.000143
hsa-miR-935	13	0.000161575	1	3.65356e-06	0.0226121	<0.000001	0	0	NA	<0.000001	1	1.0928e-05	0.0676343	0.000553
hsa-miR-140-5p	49	0.000609013	49	0.000179024	0.293958	<0.000001	68	0.000232173	0.381228	<0.000001	8	8.74241e-05	0.14355	<0.000001
hsa-miR-370	12	0.000149146	0	0	NA	<0.000001	2	6.82862e-06	0.0457848	<0.000001	0	0	NA	0.00011
hsa-let-7a*	15	0.000186433	4	1.46142e-05	0.0783887	<0.000001	7	2.39002e-05	0.128197	4e-06	2	2.1856e-05	0.117233	0.000834
hsa-miR-629	16	0.000198862	3	1.09607e-05	0.0551171	<0.000001	9	3.07288e-05	0.154524	6e-06	4	4.3712e-05	0.219811	0.003087
hsa-miR-132	40	0.000497154	21	7.67247e-05	0.154328	<0.000001	59	0.000201444	0.405195	2.3e-05	13	0.000142064	0.285755	2.5e-05
hsa-miR-485-5p	10	0.000124288	0	0	NA	<0.000001	3	1.02429e-05	0.0824126	3.2e-05	1	1.0928e-05	0.0879246	0.004145
hsa-miR-149	24	0.000298292	6	2.19213e-05	0.0734894	<0.000001	30	0.000102429	0.343386	0.000175	5	5.464e-05	0.183176	0.000106
hsa-miR-154	29	0.000360437	13	4.74962e-05	0.131774	<0.000001	41	0.000139987	0.388381	0.000198	12	0.000131136	0.363826	0.002566
hsa-miR-494	28	0.000348008	17	6.21104e-05	0.178474	<0.000001	47	0.000160473	0.461118	0.001769	8	8.74241e-05	0.251213	0.000179
hsa-miR-455-3p	102	0.00126774	83	0.000303245	0.239201	<0.000001	285	0.000973078	0.767568	0.025751	64	0.000699392	0.551683	0.000172
hsa-miR-27b*	57	0.000708444	81	0.000295938	0.417729	<0.000001	73	0.000249245	0.35182	<0.000001	11	0.000120208	0.169679	<0.000001
hsa-miR-29a*	28	0.000348008	23	8.40318e-05	0.241465	<0.000001	14	4.78003e-05	0.137354	<0.000001	11	0.000120208	0.345418	0.001997
hsa-miR-431	10	0.000124288	1	3.65356e-06	0.0293958	3e-06	2	6.82862e-06	0.0549417	9e-06	0	0	NA	0.000503
hsa-miR-409-5p	12	0.000149146	3	1.09607e-05	0.0734894	4e-06	8	2.73145e-05	0.183139	0.000217	0	0	NA	0.00011
hsa-miR-574-3p	44	0.000546869	62	0.00022652	0.414213	2.1e-05	144	0.000491661	0.899046	0.534817	12	0.000131136	0.239794	<0.000001
hsa-miR-1185	9	0.00011186	3	1.09607e-05	0.0979859	0.000179	0	0	NA	<0.000001	0	0	NA	0.001074
