# Supplementary material for: Repertoire of microRNAs in Epithelial Ovarian Cancer as Determined by Next Generation Sequencing of Small RNA cDNA Libraries
Source: PLoS One. 2009 Apr 23;4(4):e5311. doi: 10.1371/journal.pone.0005311 (PMC2668797; doi:10.1371/journal.pone.0005311)
Supplement: Table S5 — Novel and candidate miRNAs. Alternating yellow and orange miRNAs represent 5′-3′ pairs, with the yellow indicating the dominant sequence. Pink rows are the two remaining novel miRNAs. The non-highlighted sequences represent candidate miRNAs. (0.04 MB XLS) [file pone.0005311.s005.xls]

## Sheet: new_ov_novel_table
Supplementary Table S5: Novel and candidate miRNAs. Alternating yellow and orange miRNAs represent 5'-3' pairs, with the yellow indicating the dominant sequence. Pink rows are the two remaining novel miRNAs. The non-highlighted sequences represent candidate miRNAs.
Sequence ID	Count	Coords	Length	Sequence	Member 5'-3' Pair	Repeat associated	Shared seed other human miRNA	Shared seed other animal miRNA	Homologous hairpin primate	Intronic	Notes
Novel miRNAs
hsa-mir-2114 (E1550.1-2/CT7760.1-2/S11311.1-2)	9	chrX:149,146,897-149,146,976(149146909-149146930)+	22	UAGUCCCUUCCUUGAAGCGGUC	X
hsa-mir-2114* (ST19099.1/E1095.1)	3	chrX:149,146,897-149,146,976(149146945-149146965)+	21	CGAGCCUCAAGCAAGGGACUU	X
hsa-mir-449c (S7651.1-2/E4584.1)	5	chr5:54,503,854-54,503,933(54503899-54503922)-	24	UAGGCAGUGUAUUGCUAGCGGCUG	X		Homo sapiens miR-34c-5p, Homo sapiens miR-449a, Homo sapiens miR-449b, Homo sapiens miR-34a, Homo sapiens miR-34b*, Homo sapiens miR-1827	Caenorhabditis elegans miR-34, Caenorhabditis briggsae miR-34, Drosophila melanogaster miR-34, Mus musculus miR-34c, Rattus norvegicus miR-34c, Gallus gallus miR-34c, Macaca mulatta miR-34c-5p, Canis familiaris miR-34c, Mus musculus miR-34b-5p, Mus musculus miR-34a, Rattus norvegicus miR-34a, Danio rerio miR-34, Gorilla gorilla miR-34a, Ateles geoffroyi miR-34a, Pan paniscus miR-34a, Pongo pygmae…		X
hsa-mir-449c* (S14245.1)	1	chr5:54,503,854-54,503,933(54503860-54503882)-	23	UUGCUAGUUGCACUCCUCUCUGU	X					X
hsa-mir-2115 (S3745.1/E6566.1)	4	chr3:48,332,854-48,332,953(48332912-48332933)-	22	AGCUUCCAUGACUCCUGAUGGA	X	LINE
hsa-mir-2115* (S15579.1)	1	chr3:48,332,854-48,332,953(48332875-48332896)-	22	CAUCAGAAUUCAUGGAGGCUAG	X	LINE		Mus musculus miR-361, Rattus norvegicus miR-361, Bos taurus miR-361, Macaca mulatta miR-361-5p, Canis familiaris miR-361
hsa-mir-2116 (P1253.1)	4	chr15:57,250,674-57,250,753(57250720-57250740)-	21	GGUUCUUAGCAUAGGAGGUCU	X				panTro1 +	X
hsa-mir-2116* (P7199.1)	1	chr15:57,250,674-57,250,753(57250683-57250703)-	21	CCUCCCAUGCCAAGAACUCCC	X		Homo sapiens miR-532-3p	Mus musculus miR-532-3p, Rattus norvegicus miR-532-3p, Macaca mulatta miR-532-3p	panTro1 +	X
hsa-mir-2117 (ET1856.1)	3	chr17:38877700-38877780(38877750-38877770)+	21	UGUUCUCUUUGCCAAGGACAG			Homo sapiens miR-26b*	Mus musculus miR-26b*, Rattus norvegicus miR-26b*
hsa-mir-548q (S6392.2-2)	3	chr10:12807316-12807436(12807330-12807351)-	22	GCUGGUGCAAAAGUAAUGGCGG		DNA	Homo sapiens miR-138	Mus musculus miR-138, Rattus norvegicus miR-138, Bos taurus miR-138, Macaca mulatta miR-138, Canis familiaris miR-138a, Gallus gallus miR-138, Xenopus tropicalis miR-138, Monodelphis domestica miR-138, Danio rerio miR-138, Fugu rubripes miR-138, Tetraodon nigroviridis miR-138, Canis familiaris miR-138b, Danio rerio miR-133a*		X
Candidate miRNAs
S11367.3-3/E6846.3-3/CT10246.3	8	chr20:62021328-62021448(62021404-62021425)+	22	CACCCGGCUGUGUGCACAUGUG			Homo sapiens miR-941			X	Same as 941-1,2
P6404.1-2/E9130.1	3	chr10:23722243-23722466(23722343-23722366)+	20	AGCCUGGAAGCUGGAGCCUG		SINE	Homo sapiens miR-1254, Homo sapiens miR-875-3p	Macaca mulatta miR-875-3p			Morin miRNA
P1624.1	3	chr2:189,706,006-189,706,085(189706054-189706074)-	21	GCAGUAGUGUAGAGAUUGGUU	X			Mus musculus miR-199a-3p, Mus musculus miR-199b, Rattus norvegicus miR-199a-3p, Bos taurus miR-199a-3p, Macaca mulatta miR-199a-3p, Ciona intestinalis miR-199-3p, Canis familiaris miR-199	panTro1 +	X	Cand since complete complementarity in 2ndary structure
S6392.1-2	3	chrX:70,318,116-70,318,195(70318169-70318190)-	22	GCUGGUGCAAAAGUAAUGGCGG	X	DNA	Homo sapiens miR-138	Mus musculus miR-138, Rattus norvegicus miR-138, Bos taurus miR-138, Macaca mulatta miR-138, Canis familiaris miR-138a, Gallus gallus miR-138, Xenopus tropicalis miR-138, Monodelphis domestica miR-138, Danio rerio miR-138, Fugu rubripes miR-138, Tetraodon nigroviridis miR-138, Canis familiaris miR-138b, Danio rerio miR-133a*			Cand since complete complementarity in 2ndary structure
CT22442.1/ST6659.1	3	chr17:37919802-37919882(37919811-37919832)+	22	UUUUGUGUCUCCCAUUCCCCAG				Drosophila melanogaster miR-274, Drosophila pseudoobscura miR-274, Mus musculus miR-669b	rheMac2 +		mature adjacent to start of exon, whole hairpin overlaps exon
CT6350.1/P6868.1/S17375.1	4	chr9:138740490-138740570(138740506-138740525)-	20	CUGCCCUGCGGAUGCUGUCC			Homo sapiens miR-146b-3p, Homo sapiens miR-874	Mus musculus miR-874, Rattus norvegicus miR-874, Macaca mulatta miR-874, Macaca mulatta miR-146b-3p, Danio rerio miR-18b*			overlaps other non-coding rnas at one end
P829.1-4	9	chr11:121532125-121532245(121532156-121532177)-	22	CCAGGAAUCCUGCUGUGGUGGA					panTro1 +
S18330.5-3/CT14185.5-2	6	chr16:18403478-18403598(18403547-18403568)-	22	UGGGGCGGAGCUUCCGGAGGCC					rheMac2 +
S18330.1-3/CT14185.1-2	6	chr16:2126006-2126126(2126075-2126096)-	22	UGGGGCGGAGCUUCCGGAGGCC					rheMac2 +
S18330.4-3/CT34253.4-2	6	chr16:16311224-16311344(16311294-16311315)+	22	UGGGGCGGAGCUUCCGGAGGCC					rheMac2 -
S18330.3-3/CT14185.3-2	6	chr16:15156235-15156355(15156304-15156325)-	22	UGGGGCGGAGCUUCCGGAGGCC					rheMac2 +
S18330.2-3/CT34253.2-2	6	chr16:14912569-14912689(14912639-14912660)+	22	UGGGGCGGAGCUUCCGGAGGCC					rheMac2 -
S2574.1	5	chr12:110959744-110959864(110959813-110959834)-	22	UGUGUCCCAUUAUUGGUGAUUU		X
P2874.1-2/E11445.1	5	chr2:207682892-207683012(207682967-207682987)-	21	UGUCCUUGCUGUUUGGAGAUA
S21066.1/C35957.1/P10198.1	5	chr16:80124980-80125100(80125048-80125069)+	22	UGAGGUGACCGCAGAUGGGAAG
P9723.2-3	4	chr11:16897649-16897769(16897707-16897728)+	22	AGCCCAGGAGUUGGAUGCUGCA		X
S5207.1-3	4	chrX:62922631-62922751(62922659-62922680)-	22	CUCCGUUUGCCUGUUUCGCUGA
C35096.1-3/P7248.1	4	chrX:69159407-69159527(69159474-69159494)+	21	CUGUCCUAAGGUUGUUGAGUU					panTro1 +
P9723.1-3	4	chr20:9719152-9719272(9719230-9719251)-	22	AGCCCAGGAGUUGGAUGCUGCA		X
CT12518.1-4	4	chr1:559663-559743(559675-559695)-	21	AGGAGGGCUGAGAGGGCCCCU
E5118.1/ST16443.1-2	4	chr19:4284747-4284867(4284814-4284835)-	22	UCCCCUGCUUCUAUGCCCCCAG
S4519.1	3	chr19:12327310-12327430(12327313-12327332)-	20	CGUGUGGUGUGCGCCUGUAA		X
S3867.4	3	chr14:18350946-18351066(18351010-18351031)-	22	UUCUGGAAUUCUGUGUGAGGGA		X
S3923.1	3	chr21:42704545-42704665(42704621-42704641)-	21	UGUGGUGCUUAUGUGUGUGUC		X
S3867.1	3	chr22:14925813-14925933(14925878-14925899)+	22	UUCUGGAAUUCUGUGUGAGGGA		X
P1442.1	3	chr12:124115642-124115762(124115712-124115731)-	20	UUGGCCCCAGCUCCCCGACC					panTro1 +
P2704.3-2	3	chr8:23201150-23201270(23201175-23201196)-	22	UGGUGCAAAGUAAUUGUGGUUU		X
PT1944.1/CT24933.1	3	chr17:18027036-18027116(18027086-18027106)-	21	UCCCGGUGACGGCGAGCGUGG
ET9885.1/PT3988.1	2	chr22:31074067-31074147(31074123-31074144)-	22	UCCCUGUCCUCCAGGAGCUCAC		X	Homo sapiens miR-1274a, Homo sapiens miR-339-5p, Homo sapiens miR-1274b	Rattus norvegicus miR-339-5p, Mus musculus miR-339-5p, Macaca mulatta miR-339-5p
S6047.1	2	chr22:41441910-41442030(41441917-41441938)-	22	UGCUGGUGCAUUCCUGUAAUCC		X	Homo sapiens miR-138	Mus musculus miR-138, Rattus norvegicus miR-138, Bos taurus miR-138, Macaca mulatta miR-138, Canis familiaris miR-138a, Gallus gallus miR-138, Xenopus tropicalis miR-138, Monodelphis domestica miR-138, Danio rerio miR-138, Fugu rubripes miR-138, Tetraodon nigroviridis miR-138, Canis familiaris miR-138b, Danio rerio miR-133a*
P2620.1	2	chr10:71752690-71752810(71752719-71752739)-	21	AGGCCAUUCCCCAUCAGAUGA			Homo sapiens miR-15a*	Canis familiaris miR-1836, Mus musculus miR-15a*
P2123.1	2	chr11:68607198-68607318(68607273-68607294)+	22	CCGUUUUGCUUGAAGUCGCAGU		X	Homo sapiens miR-19b-2*, Homo sapiens miR-507, Homo sapiens miR-19a*, Homo sapiens miR-19b-1*, Homo sapiens miR-450b-5p	Mus musculus miR-19a*, Danio rerio miR-19a*, Danio rerio miR-19b*	panTro1 +
P2819.1	2	chr8:22475176-22475296(22475211-22475230)-	20	AGCACCACCCCCUUGCUCCU			Homo sapiens miR-29c, Homo sapiens miR-29b, Homo sapiens miR-29a	Caenorhabditis elegans miR-83, Mus musculus miR-29b, Rattus norvegicus miR-29b, Gallus gallus miR-29b, Xenopus tropicalis miR-29b, Macaca mulatta miR-29b, Canis familiaris miR-29b, Drosophila melanogaster miR-285, Drosophila pseudoobscura miR-285, Mus musculus miR-29a, Rattus norvegicus miR-29a, Canis familiaris miR-29a, Mus musculus miR-29c, Rattus norvegicus miR-29c, Danio rerio miR-29a, Sus sc…
ST12307.1/C31944.1	2	chr13:26157452-26157552(26157514-26157535)+	22	UAUGUGCCUAGUGGCUGCUGUC		X	Homo sapiens miR-455-5p	Danio rerio miR-455, Fugu rubripes miR-455, Tetraodon nigroviridis miR-455, Gallus gallus miR-455, Xenopus tropicalis miR-455, Bos taurus miR-455, Rattus norvegicus miR-455, Macaca mulatta miR-455-5p, Canis familiaris miR-455, Mus musculus miR-455*
E5240.1/ST121178.1	2	chrX:146139374-146139494(146139407-146139428)-	22	UUCUCAAGAGGGAGGCAAUCAU			Homo sapiens miR-513c	Ateles geoffroyi miR-513c
S11130.1-2	2	chrX:126278711-126278831(126278790-126278811)-	22	UCUGGAGGUGGUUGAAAGGAAA		X	Homo sapiens miR-516b	Canis familiaris miR-1843
CT5948.1	2	chr1:81947451-81947531(81947463-81947484)+	22	UAAAAGUAAUUGUGGUAUUUGC		X	Homo sapiens miR-548a-5p, Homo sapiens miR-548b-5p, Homo sapiens miR-548n, Homo sapiens miR-548c-5p, Homo sapiens miR-548i, Homo sapiens miR-548d-5p, Homo sapiens miR-548j, Homo sapiens miR-548h, Homo sapiens miR-548k, Homo sapiens miR-548l	Drosophila melanogaster miR-1013	panTro1 +
E5379.2/S10015.2	2	chr18:38742745-38742865(38742775-38742796)+	22	UGCAAAAAUAAUUGUGGUUUUG		X	Homo sapiens miR-548c-3p		panTro1 +
E5379.5/S10015.5	2	chr8:31047148-31047268(31047181-31047202)+	22	UGCAAAAAUAAUUGUGGUUUUG		X	Homo sapiens miR-548c-3p		panTro1 +
E5379.3/S10015.3	2	chr17:42350873-42350993(42350913-42350934)-	22	UGCAAAAAUAAUUGUGGUUUUG		X	Homo sapiens miR-548c-3p
P1867.5	2	chr4:110443247-110443367(110443312-110443334)+	23	UGAGUGUGUGUGUGAGUGUGUGA			Homo sapiens miR-574-5p	Mus musculus miR-574-5p
P1867.4	2	chr8:134686171-134686291(134686251-134686273)-	23	UGAGUGUGUGUGUGAGUGUGUGA		X	Homo sapiens miR-574-5p	Mus musculus miR-574-5p
P1867.3	2	chr11:14389633-14389753(14389667-14389689)-	23	UGAGUGUGUGUGUGAGUGUGUGA		X	Homo sapiens miR-574-5p	Mus musculus miR-574-5p
S4590.1	2	chr2:232239997-232240117(232240068-232240087)+	20	UCCCUCUGUUCCCAAGCCUG			Homo sapiens miR-642		panTro1 +
P3552.1/ET5296.1	2	chr1:148473664-148473784(148473740-148473761)+	22	UGAGGCCGAGAAGGCAACCGCG				Danio rerio miR-739	panTro1 +
P1986.10	2	chr7:67622026-67622146(67622030-67622051)+	22	UCUGGGCAACAAAGUGAGACCU		X		Mus musculus miR-326, Rattus norvegicus miR-326, Sus scrofa miR-326, Oikopleura dioica miR-1475, Oikopleura dioica miR-1476-5p	panTro1 +
S7655.1	2	chr20:9985004-9985124(9985032-9985053)-	22	GAGCAAAAGUAAUUGCGGUUUU		X	Homo sapiens miR-548p		panTro1 +
S7655.5	2	chr2:202688107-202688227(202688149-202688170)+	22	GAGCAAAAGUAAUUGCGGUUUU		X	Homo sapiens miR-548p
S7655.6	2	chr1:45470450-45470570(45470491-45470512)+	22	GAGCAAAAGUAAUUGCGGUUUU		X	Homo sapiens miR-548p
S7655.3	2	chr8:17583374-17583494(17583413-17583434)-	22	GAGCAAAAGUAAUUGCGGUUUU		X	Homo sapiens miR-548p
P8298.1/PT5950.1	2	chr2:69184286-69184406(69184327-69184348)+	22	UGAGGGACAGAUGCCAGAAGCA				Caenorhabditis elegans miR-265
S8631.3-2	2	chr8:27138271-27138391(27138302-27138323)+	22	AGGCUGGUGCAAAAGUAAUGGC		X		Danio rerio miR-456, MI0004997 Gallus miR-456
